# Supplementary material for: Mechanochromic luminescence of phase-separated hydrogels that contain cyclophane mechanophores
Source: Royal Society of Chemistry journal article supplement (doi:10.1039/d3qm00579h), 2023-01-01

## Supporting Information

# Mechanochromic luminescence of phase-separated hydrogels that contain cyclophane mechanophores

Shohei Shimizu, Hiroaki Yoshida, Koichi Mayumi, Hiroharu Ajiro and Yoshimitsu Sagara\*

E-mail: [sagara.y.aa@m.titech.ac.jp](mailto:sagara.y.aa@m.titech.ac.jp)

### Table of Contents

|                                                                             |            |
|-----------------------------------------------------------------------------|------------|
| <b>General Methods</b>                                                      | <b>S2</b>  |
| <b>Synthesis of compounds 1, 2, and 3</b>                                   | <b>S3</b>  |
| <b>Preparation of DMSO gels and hydrogels</b>                               | <b>S8</b>  |
| <b>Emission spectra in solution</b>                                         | <b>S9</b>  |
| <b>Emission lifetime measurements in solution</b>                           | <b>S10</b> |
| <b>Fluorescence quantum yields of compounds and gels</b>                    | <b>S10</b> |
| <b>Small-angle neutron scattering (SANS) measurement</b>                    | <b>S10</b> |
| <b>Mechanical properties of hydrogels</b>                                   | <b>S11</b> |
| <b>Photophysical properties of gels and dry films</b>                       | <b>S13</b> |
| <b>Photophysical properties of HG2 and HG3 upon deformation</b>             | <b>S13</b> |
| <b>Emission decay profiles of HG1 upon stretching</b>                       | <b>S14</b> |
| <b>Changes of the fluorescence intensity ratio during stress relaxation</b> | <b>S14</b> |
| <b>References</b>                                                           | <b>S15</b> |
| <b>NMR spectra</b>                                                          | <b>S16</b> |

## General methods

All reagents and solvents were purchased from Tokyo Kasei, Kanto Chemical, FUJIFILM WAKO Pure Chemical Corporation, or Merck. Inhibitor-free anhydrous dimethyl sulfoxide (DMSO) was used as a solvent for free radical polymerization to prepare DMSO gels. Acrylamide monomer was purified by recrystallization from acetone and dried in vacuum at room temperature (r.t.) for 12 h. Ethyl acrylate was used after polymerization inhibitor was removed with activated alumina. Flash silica gel column chromatography was carried out with a Biotage Isorela flash system using SHOKO-scientific Purif-Pack-EX cartridges. Recycling preparative gel permeation chromatography (GPC) was performed with a Japan Analytical Industry LaboACE.  $^1\text{H}$  NMR spectra were measured with a JEOL JNM-ECZ400S/L1 spectrometer at r.t. and all chemical shifts are reported on the  $\delta$ -scale in ppm relative to the signal of tetramethylsilane (TMS, at 0.00) as an internal standard. Coupling constants ( $J$ ) are quoted in Hz and relative intensities are reported. Proton-decoupled  $^{13}\text{C}$  NMR spectra were acquired on a JEOL JNM-ECZ400S/L1 spectrometer at r.t. or 45 °C and all chemical shifts are expressed in ppm using solvents as the internal standards ( $\text{CDCl}_3$ , at 77.16;  $\text{DMSO-}d_6$ , at 39.52). Matrix Assisted Laser Desorption Ionization Time-of-Flight (MALDI-TOF) mass spectroscopy was performed with a SHIMADZU AXIMA-Performance. High-resolution electrospray ionization (ESI) mass spectroscopy was performed with a Bruker Daltonics micrOTOF II. Gel preparation was conducted in a UNICO UN-800L-TKS glovebox. Stress-strain measurements were conducted under ambient conditions with a SHIMADZU AGS-100NX equipped with a 100 N load cell at a strain rate of 0.2  $\text{s}^{-1}$ . SANS experiments were conducted with the SANS-U spectrometer of the Institute for Solid State Physics, the University of Tokyo, located at the JRR-3M research reactor of Japan Atomic Energy Agency in Tokai, Japan. The neutron wavelength  $\lambda$  was 7.0 Å with  $\Delta\lambda/\lambda = 10\%$  full width at half maximum, and the sample-to-detector distances were 16 m, 8 m, and 1 m. The scattered neutrons were collected with a two-dimensional detector (model 2660N, Ordela). After air and cell scattering subtractions, the scattered intensity was normalized to the absolute intensity using a polyethylene file as a standard sample. The 2-D scattering pattern was converted into a 1-D profile by the circular averaging, followed by the incoherent scattering subtraction. The scattering intensity was plotted against the magnitude of the scattering vector,  $Q$ . The temperature of the sample was 25 °C. Absorption spectra were measured on a JASCO V-750. Steady-state fluorescence spectra of solutions were recorded with a JASCO FP-6500 and the spectra were corrected for the detector nonlinearity. Steady-state fluorescence spectra of gels were monitored with an Ocean Optics QEPro-FL equipped with an LLS-385 LED light source and a Reflection/Backscattering Probe R400-7-UV-VIS. These spectra were not corrected. Time-resolved fluorescence microscopy was performed with a Hamamatsu Photonics Quantaaurus-Tau. Fluorescence quantum yields measurements were carried out with a Hamamatsu Photonics Quantaaurus-QY. Photographs were taken with a Canon EOS 9000D stabilized with a tripod.

Swelling ratio of hydrogels at r.t. was determined by a following equation (1), where  $W_s$  is mass of hydrogels and  $W_d$  is mass of dry polymers.

$$\text{Swelling ratio} = (W_s - W_d) / W_d \quad (1)$$

Net volume of gels swollen with the mixture of water and DMSO was determined by an equation (2), where  $d$  is a thickness of the gels and  $d_h$  is a thickness of the initial hydrogel.

$$\text{Net volume} = (d/d_h)^3 \quad (2)$$

## Synthesis of compounds 1, 2, and 3

The synthetic procedures used to prepare compounds **1**, **2**, and **3** are shown in Schemes S1 and S2. Compounds **4**, **7**, and *N*-propargylacrylamide were prepared according to reported procedures.<sup>S1,S2</sup>

**Compound 5.** *p*-Toluenesulfonyl chloride (131 mg, 0.689 mmol) was added to a mixture of **4** (80.0 mg,  $5.74 \times 10^{-2}$  mmol), 4-dimethylaminopyridine (0.7 mg,  $6 \times 10^{-3}$  mmol), and Et<sub>3</sub>N (139 mg, 1.38 mmol) in CH<sub>2</sub>Cl<sub>2</sub> (30 mL). The mixture was then stirred under nitrogen atmosphere for 14 h at r.t. The reaction mixture was poured into CH<sub>2</sub>Cl<sub>2</sub> (50 mL), and the organic layer was washed with 5% aq. HCl (50 mL), saturated aq. NaHCO<sub>3</sub> (50 mL), and saturated aq. NaCl (50 mL). The organic layer was dried over MgSO<sub>4</sub> and filtered before the solvent was evaporated under reduced pressure. The crude product was purified by flash column chromatography on silica gel (eluent: gradient from CH<sub>2</sub>Cl<sub>2</sub> to CH<sub>2</sub>Cl<sub>2</sub>/acetone = 9/1 v/v) to afford **5** (56.2 mg,  $3.30 \times 10^{-2}$  mmol, 58%) as a yellow solid.

<sup>1</sup>H NMR (400 MHz, CDCl<sub>3</sub>):  $\delta$  = 2.40 (s, 6H), 3.65–3.68 (m, 4H), 3.71–3.75 (m, 8H), 3.80 (s, 8H), 3.88–3.94 (m, 12H), 4.13 (t,  $J$  = 4.8 Hz, 4H), 4.17–4.22 (m, 12H), 6.61 (t,  $J$  = 2.4 Hz, 2H), 6.85–6.89 (m, 6H), 6.91–6.92 (m, 2H), 7.29–7.32 (m, 6H), 7.44 (d,  $J$  = 8.4 Hz, 4H), 7.66 (d,  $J$  = 8.0 Hz, 2H), 7.71–7.81 (m, 10H), 7.86 (d,  $J$  = 9.2 Hz, 2H), 8.01 (d,  $J$  = 8.0 Hz, 2H), 8.44 (d,  $J$  = 9.2 Hz, 2H). <sup>13</sup>C NMR (100 MHz, CDCl<sub>3</sub>):  $\delta$  = 21.77, 67.70, 67.80, 68.93, 69.42, 69.93, 70.95, 70.99, 71.29, 87.27, 88.87, 95.27, 95.46, 102.88, 110.35, 110.81, 114.81, 115.81, 117.61, 118.54, 123.51, 123.70, 124.79, 125.11, 125.63, 125.69, 127.04, 128.12, 129.23, 129.79, 129.97, 130.42, 130.88, 131.12, 131.92, 133.05, 133.24, 144.97, 159.04, 159.90, 160.05. MS (MALDI-TOF):  $m/z$ : 1701.04 (calcd.  $[M]^+ = 1700.56$ ).

**Compound 6.** Sodium azide (106 mg, 0.823 mmol) was added to a mixture of **5** (70.0 mg,  $4.11 \times 10^{-2}$  mmol) in DMF (10 mL). The mixture was then stirred under nitrogen atmosphere for 24 h at 60 °C. The reaction mixture was poured into ethyl acetate (50 mL), and the organic layer was washed with saturated aq. NH<sub>4</sub>Cl (4  $\times$  50 mL) and saturated aq. NaCl (50 mL). The organic layer was dried over MgSO<sub>4</sub> and filtered before the solvent was evaporated under reduced pressure. The crude product was purified by flash column chromatography on silica gel (eluent: gradient from CH<sub>2</sub>Cl<sub>2</sub> to CH<sub>2</sub>Cl<sub>2</sub>/acetone = 4/1 v/v) to afford **6** (53.1 mg,  $3.68 \times 10^{-2}$  mmol, 89%) as a yellow solid.

<sup>1</sup>H NMR (400 MHz, CDCl<sub>3</sub>):  $\delta$  = 3.43 (t,  $J$  = 5.2 Hz, 4H), 3.71–3.75 (m, 8H), 3.79–3.81 (m, 12H), 3.91–3.96 (m, 12H), 4.12–4.15 (m, 4H), 4.17–4.20 (m, 4H), 4.23–4.25 (m, 4H), 6.62 (t,  $J$  = 2.4 Hz, 2H), 6.86–6.88 (m, 6H), 6.92–6.93 (m, 2H), 7.31 (d,  $J$  = 9.2 Hz, 2H), 7.44 (d,  $J$  = 8.8 Hz, 4H), 7.66 (d,  $J$  = 7.6 Hz, 2H), 7.71–7.79 (m, 6H), 7.86 (d,  $J$  = 8.8 Hz, 2H), 8.01 (d,  $J$  = 8.0 Hz, 2H), 8.44 (d,  $J$  = 9.2 Hz, 2H). <sup>13</sup>C NMR (100 MHz, CDCl<sub>3</sub>):  $\delta$  = 50.85, 67.70, 67.81, 69.95, 70.30, 70.94, 71.08, 71.31, 87.28, 88.86, 95.27, 95.46, 102.91, 110.42, 110.77, 114.81, 115.83, 117.62, 118.54, 123.52, 123.71, 124.79, 125.11, 125.63, 125.70, 127.05, 128.08, 129.23, 129.79, 130.43, 130.88, 131.13, 131.92, 133.24, 159.04, 159.92, 160.03. MS (MALDI-TOF):  $m/z$ : 1442.22 (calcd.  $[M]^+ = 1442.56$ ).

**Mechanophore 1.** Copper iodide (5.80 mg,  $3.05 \times 10^{-2}$  mmol) was added to a mixture of **6** (22.0 mg,  $1.52 \times 10^{-2}$  mmol), *N*-propargylacrylamide (49.9 mg, 0.457 mmol), and Et<sub>3</sub>N (1 mL) in CHCl<sub>3</sub> (5 mL). The mixture was then stirred under nitrogen atmosphere for 3 d at r.t. The reaction mixture was poured into CHCl<sub>3</sub> (200 mL), and the organic layer was washed with 5% aq. HCl (30 mL), saturated aq. NaHCO<sub>3</sub> (50 mL), and saturated aq. NaCl (50 mL). The organic layer was dried over MgSO<sub>4</sub> and filtered before the solvent was evaporated under reduced

pressure. The crude product was purified by flash column chromatography on silica gel (eluent: gradient from  $\text{CH}_2\text{Cl}_2/\text{acetone} = 4/1$  v/v to acetone) and recycling GPC (eluent: chloroform) to afford **1** (10.5 mg,  $6.32 \times 10^{-3}$  mmol, 40%) as a yellow solid.

$^1\text{H}$  NMR (400 MHz,  $\text{DMSO}-d_6$ ):  $\delta = 3.60\text{--}3.67$  (m, 16H), 3.76–3.86 (m, 16H), 4.11–4.13 (m, 4H), 4.20–4.22 (m, 8H), 4.40 (d,  $J = 5.6$  Hz, 4H), 4.52 (t,  $J = 5.2$  Hz, 4H), 5.58 (dd,  $J = 10.0, 2.0$  Hz, 2H), 6.12 (dd,  $J = 17.2, 2.0$  Hz, 2H), 6.25 (dd,  $J = 17.2, 10.0$  Hz, 2H), 6.67–6.73 (br, 2H), 6.90–6.95 (m, 8H), 7.42 (d,  $J = 8.8$  Hz, 4H), 7.59–7.65 (m, 4H), 7.82 (d,  $J = 9.2$  Hz, 2H), 7.92–7.98 (m, 6H), 8.03 (d,  $J = 9.2$  Hz, 2H), 8.10 (d,  $J = 7.6$  Hz, 2H), 8.47–8.51 (m, 4H).  $^{13}\text{C}$  NMR (100 MHz,  $\text{DMSO}-d_6$ , 45 °C):  $\delta = 34.05, 49.20, 67.38, 67.46, 67.48, 68.67, 68.72, 68.81, 69.52, 69.68, 70.07, 70.08, 86.42, 87.92, 95.21, 95.26, 102.61, 109.65, 110.63, 114.28, 114.71, 116.91, 117.55, 122.62, 122.82, 123.05, 123.86, 124.85, 124.94, 125.05, 125.13, 127.20, 128.08, 128.88, 129.55, 129.83, 130.19, 130.26, 131.01, 131.47, 132.74, 144.34, 158.78, 159.67, 159.70, 164.36$ . HRMS (ESI-TOF):  $m/z$ : 853.3213 (calcd.  $[\text{M}+2\text{Na}]^{2+} = 853.3207$ ).

### Scheme S1

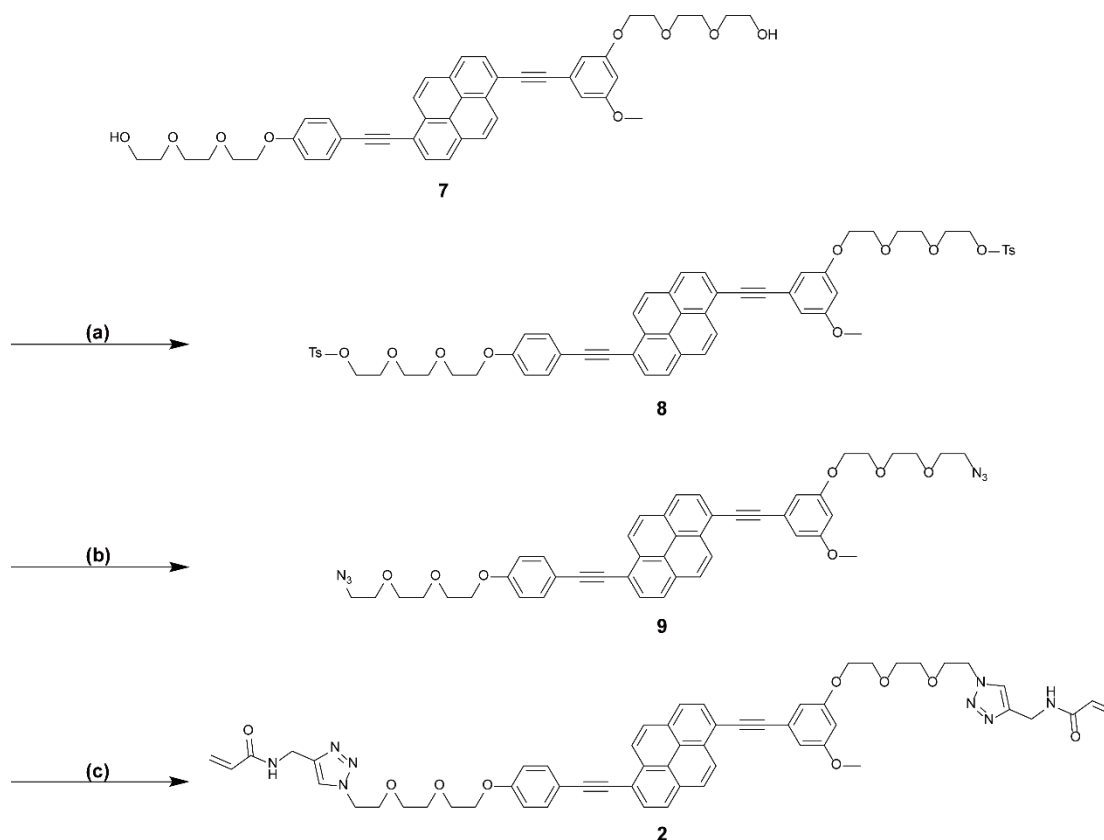

Conditions: (a) *p*-toluenesulfonyl chloride, 4-dimethylaminopyridine,  $\text{Et}_3\text{N}$ ,  $\text{CH}_2\text{Cl}_2$ , r.t., 40 h; (b) sodium azide, DMF, 60 °C, 18 h; (c) *N*-propargylacrylamide,  $\text{CuI}$ ,  $\text{Et}_3\text{N}$ ,  $\text{CHCl}_3$ , r.t., 2 d.

**Compound 8.** *p*-Toluenesulfonyl chloride (367 mg, 1.93 mmol) was added to a mixture of **7** (234 mg, 0.321 mmol), 4-dimethylaminopyridine (3.90 mg,  $3.21 \times 10^{-2}$  mmol), and  $\text{Et}_3\text{N}$  (390 mg, 3.85 mmol) in  $\text{CH}_2\text{Cl}_2$  (10 mL). The mixture was then stirred under nitrogen atmosphere for 40 h at r.t. The reaction mixture was poured into  $\text{CH}_2\text{Cl}_2$  (50

mL), and the organic layer was washed with 5% aq. HCl (50 mL), saturated aq. NaHCO<sub>3</sub> (50 mL), and saturated aq. NaCl (50 mL). The organic layer was dried over MgSO<sub>4</sub> and filtered before the solvent was evaporated under reduced pressure. The crude product was purified by flash column chromatography on silica gel (eluent: gradient from CH<sub>2</sub>Cl<sub>2</sub> to CH<sub>2</sub>Cl<sub>2</sub>/acetone = 9/1 v/v) to afford **8** (286 mg, 0.276 mmol, 86%) as a yellow solid.

<sup>1</sup>H NMR (400 MHz, CDCl<sub>3</sub>): δ = 2.40 (s, 3H), 2.42 (s, 3H), 3.63–3.65 (m, 4H), 3.68–3.73 (m, 8H), 3.86–3.87 (m, 7H), 4.16–4.19 (m, 8H), 6.55 (s, 1H), 6.87 (s, 2H), 6.97 (d, *J* = 8.4 Hz, 2H), 7.31 (t, *J* = 8.8 Hz, 4H), 7.64 (d, *J* = 8.4 Hz, 2H), 7.78–7.82 (m, 4H), 8.12–8.21 (m, 6H), 8.62–8.68 (m, 2H). <sup>13</sup>C NMR (100 MHz, CDCl<sub>3</sub>): δ = 21.74, 21.77, 55.67, 67.60, 67.74, 68.88, 69.38, 69.84, 70.93, 87.44, 88.28, 95.51, 95.76, 102.62, 109.91, 110.14, 114.91, 115.80, 118.20, 119.03, 124.33, 124.78, 125.17, 125.35, 126.17, 126.54, 128.10, 128.35, 129.94, 129.96, 130.09, 131.00, 131.37, 131.92, 132.22, 133.04, 133.30, 144.94, 144.97, 159.15, 159.92, 160.75. MS (MALDI-TOF): *m/z*: 1036.26 (calcd. [M]<sup>+</sup> = 1036.32).

**Compound 9.** Sodium azide (179 mg, 2.76 mmol) was added to a mixture of **8** (143 mg, 0.138 mmol) in DMF (20 mL). The mixture was then stirred under nitrogen atmosphere for 18 h at 60 °C. The reaction mixture was poured into ethyl acetate (50 mL), and the organic layer was washed with saturated aq. NH<sub>4</sub>Cl (4 × 50 mL) and saturated aq. NaCl (50 mL). The organic layer was dried over MgSO<sub>4</sub> and filtered before the solvent was evaporated under reduced pressure. The crude product was purified by flash column chromatography on silica gel (eluent: gradient from CH<sub>2</sub>Cl<sub>2</sub> to CH<sub>2</sub>Cl<sub>2</sub>/acetone = 4/1 v/v) to afford **9** (105 mg, 0.135 mmol, 98%) as a yellow solid.

<sup>1</sup>H NMR (400 MHz, CDCl<sub>3</sub>): δ = 3.40 (t, *J* = 4.8 Hz, 4H), 3.68–3.72 (m, 8H), 3.75–3.78 (m, 4H), 3.86 (s, 3H), 3.90 (t, *J* = 4.8 Hz, 4H), 4.17–4.20 (m, 4H), 6.55 (t, *J* = 2.4 Hz, 1H), 6.87–6.89 (m, 2H), 6.97 (d, *J* = 8.8 Hz, 2H), 7.64 (d, *J* = 8.8 Hz, 2H), 8.10–8.15 (m, 4H), 8.18 (dd, *J* = 8.0, 4.0 Hz, 2H), 8.61–8.66 (m, 2H). <sup>13</sup>C NMR (100 MHz, CDCl<sub>3</sub>): δ = 50.79, 55.64, 67.60, 67.75, 69.87, 70.23, 70.86, 71.02, 87.42, 88.27, 95.50, 95.75, 102.62, 109.88, 110.16, 114.90, 115.78, 118.19, 119.01, 124.29, 124.77, 125.14, 125.31, 126.13, 126.51, 128.07, 128.30, 129.89, 130.05, 130.96, 131.34, 131.89, 132.19, 133.28, 159.15, 159.92, 160.72. MS (MALDI-TOF): *m/z*: 778.04 (calcd. [M]<sup>+</sup> = 778.31).

**Compound 2.** Copper iodide (38.0 mg, 0.200 mmol) was added to a mixture of **9** (52.0 mg, 6.68 × 10<sup>-2</sup> mmol), *N*-propargylacrylamide (36.0 mg, 0.334 mmol), and Et<sub>3</sub>N (1 mL) in CHCl<sub>3</sub> (10 mL). The mixture was then stirred under nitrogen atmosphere for 2 d at r.t. The reaction mixture was poured into CHCl<sub>3</sub> (200 mL), and the organic layer was washed with 5% aq. HCl (30 mL), saturated aq. NaHCO<sub>3</sub> (50 mL), and saturated aq. NaCl (50 mL). The organic layer was dried over MgSO<sub>4</sub> and filtered before the solvent was evaporated under reduced pressure. The crude product was purified by flash column chromatography on silica gel (eluent: gradient from CH<sub>2</sub>Cl<sub>2</sub>/acetone = 1/1 v/v to acetone) and recycling GPC (eluent: chloroform) to afford **2** (37.0 mg, 1.81 mmol, 55%) as a yellow solid.

<sup>1</sup>H NMR (400 MHz, CDCl<sub>3</sub>): δ = 3.64–3.66 (m, 4H), 3.70–3.72 (m, 4H), 3.85–3.89 (m, 11H), 4.17–4.20 (m, 4H), 4.51–4.54 (m, 4H), 4.57–4.59 (m, 4H), 5.61–5.66 (m, 2H), 6.06–6.16 (m, 2H), 6.26–6.33 (m, 2H), 6.54–6.58 (m, 3H), 6.88 (t, *J* = 2.4 Hz, 2H), 6.97 (d, *J* = 8.8 Hz, 2H), 7.65 (d, *J* = 8.8 Hz, 2H), 7.75 (d, *J* = 6.4 Hz, 2H), 8.13–8.22 (m, 6H), 8.63–8.68 (m, 2H). <sup>13</sup>C NMR (100 MHz, CDCl<sub>3</sub>): δ = 29.83, 35.03, 50.43, 55.69, 67.63, 67.80, 69.58, 69.83, 69.84, 70.64, 70.74, 70.76, 70.87, 87.49, 88.35, 95.46, 95.72, 102.70, 109.89, 110.21, 114.91, 115.89, 118.18, 119.03,

123.53, 123.55, 124.36, 124.83, 125.20, 125.37, 126.18, 126.58, 126.95, 126.97, 128.14, 128.38, 129.96, 130.11, 130.65, 131.02, 131.41, 131.94, 132.23, 133.35, 144.36, 159.09, 159.88, 160.77, 165.59. HRMS (ESI-TOF):  $m/z$ : 1019.4081 (calcd.  $[M+Na]^+ = 1019.4063$ ).

### Scheme S2

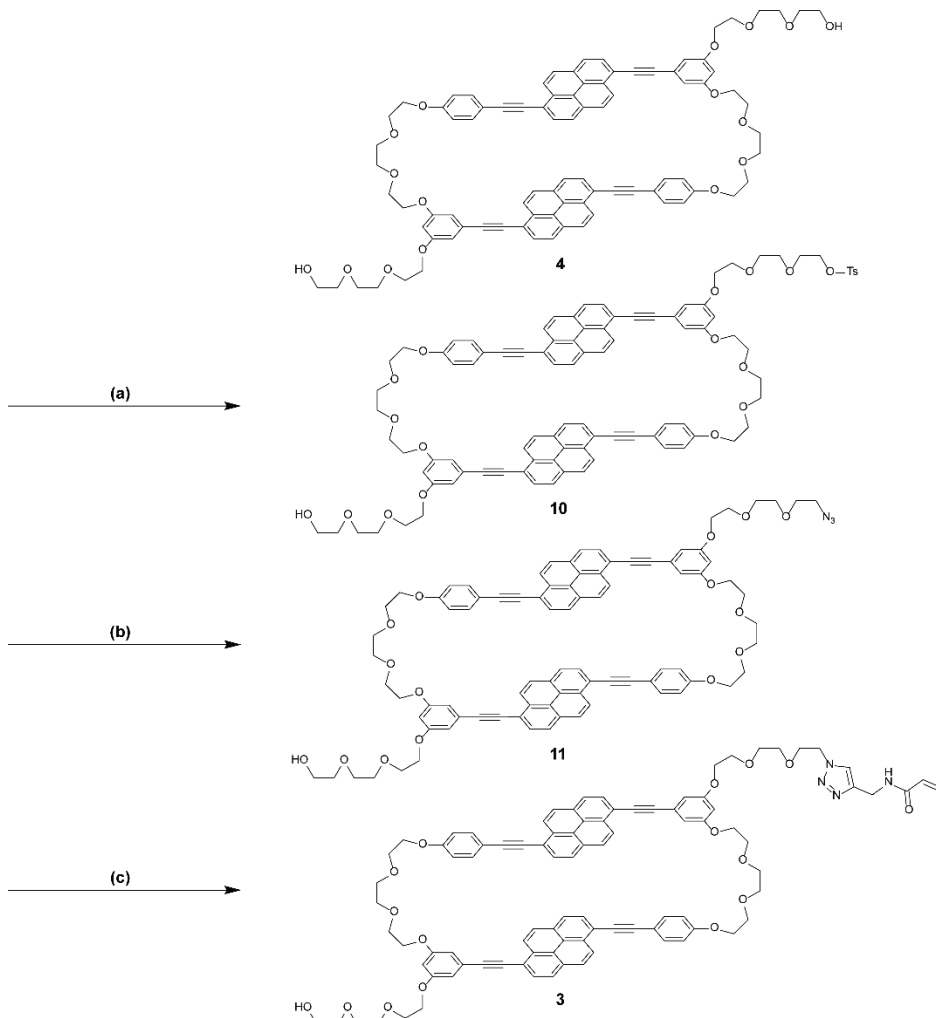

Conditions: (a) *p*-toluenesulfonyl chloride, 4-dimethylaminopyridine,  $Et_3N$ ,  $CH_2Cl_2$ , r.t., 40 h; (b) sodium azide, DMF, 60 °C, 18 h; (c) *N*-propargylamide,  $CuI$ ,  $Et_3N$ ,  $CHCl_3$ , r.t., 2 d.

**Compound 10.** *p*-Toluenesulfonyl chloride (16.4 mg,  $8.62 \times 10^{-2}$  mmol) was added to a mixture of **4** (60.0 mg,  $4.31 \times 10^{-2}$  mmol), 4-dimethylaminopyridine (0.5 mg,  $4 \times 10^{-3}$  mmol), and  $Et_3N$  (1.0 mL) in  $CH_2Cl_2$  (120 mL). The mixture was then stirred under nitrogen atmosphere for 40 h at r.t. The reaction mixture was poured into  $CH_2Cl_2$  (50 mL), and the organic layer was washed with 5% aq. HCl (50 mL), saturated aq.  $NaHCO_3$  (50 mL), and saturated aq. NaCl (50 mL). The organic layer was dried over  $MgSO_4$  and filtered before the solvent was evaporated under reduced pressure. The crude product was purified by flash column chromatography on silica gel (eluent: gradient from  $CH_2Cl_2$  to  $CH_2Cl_2$ /acetone = 65/35 v/v) to afford **10** (25.1 mg,  $1.62 \times 10^{-2}$  mmol, 37%) as a yellow solid.

$^1H$  NMR (400 MHz,  $CDCl_3$ ):  $\delta$  = 2.40 (s, 3H), 3.65–3.68 (m, 4H), 3.71–3.81 (m, 20H), 3.88–3.95 (m, 12H), 4.12–

4.15 (m, 4H), 4.18–4.25 (m, 8H), 6.61 (t,  $J = 2.4$  Hz, 1H), 6.63 (t,  $J = 2.4$  Hz, 1H), 6.86–6.89 (m, 6H), 6.91–6.93 (m, 2H), 7.29–7.32 (m, 4H), 7.44 (d,  $J = 8.8$  Hz, 4H), 7.65–7.67 (m, 2H), 7.72 (d,  $J = 8.4$  Hz, 2H), 7.75–7.82 (m, 6H), 7.84–7.87 (m, 2H), 8.01 (d,  $J = 8.0$  Hz, 2H), 8.43–8.45 (m, 2H).  $^{13}\text{C}$  NMR (100 MHz,  $\text{CDCl}_3$ ):  $\delta = 21.78, 61.96, 67.70, 67.80, 68.93, 69.42, 69.86, 69.94, 70.59, 70.95, 71.00, 71.03, 71.31, 72.63, 87.27, 88.86, 95.26, 95.45, 102.88, 102.94, 110.35, 110.39, 110.78, 114.80, 115.80, 117.59, 117.61, 118.54, 123.50, 123.69, 124.79, 125.10, 125.63, 125.69, 127.04, 128.09, 128.12, 129.22, 129.79, 129.97, 130.42, 130.87, 131.12, 131.92, 133.04, 133.24, 144.97, 159.04, 159.85, 159.89, 160.04$ . MS (MALDI-TOF):  $m/z$ : 1546.90 (calcd.  $[\text{M}]^+ = 1546.55$ ).

**Compound 11.** Sodium azide (10.5 mg, 0.162 mmol) was added to a mixture of **10** (25.1 mg,  $1.62 \times 10^{-2}$  mmol) in DMF (20 mL). The mixture was then stirred under nitrogen atmosphere for 18 h at 60 °C. The reaction mixture was poured into ethyl acetate (50 mL), and the organic layer was washed with saturated aq.  $\text{NH}_4\text{Cl}$  ( $4 \times 50$  mL) and saturated aq.  $\text{NaCl}$  (50 mL). The organic layer was dried over  $\text{MgSO}_4$  and filtered before the solvent was evaporated under reduced pressure. The crude product was purified by flash column chromatography on silica gel (eluent: gradient from  $\text{CH}_2\text{Cl}_2$  to  $\text{CH}_2\text{Cl}_2/\text{acetone} = 50/50$  v/v) to afford **11** (15.0 mg,  $1.06 \times 10^{-2}$  mmol, 66%) as a yellow solid.

$^1\text{H}$  NMR (400 MHz,  $\text{CDCl}_3$ ):  $\delta = 2.41$  (s, 1H), 3.43 (t,  $J = 5.2$  Hz, 2H), 3.65–3.68 (m, 2H), 3.71–3.82 (m, 20 H), 3.91–3.96 (m, 12H), 4.13 (t,  $J = 4.4$  Hz, 4H), 4.19 (t,  $J = 4.4$  Hz, 4H), 4.24 (t,  $J = 4.4$  Hz, 4H), 6.62–6.64 (m, 2H), 6.85–6.88 (m, 6H), 6.93 (t,  $J = 0.8$  Hz, 2H), 7.30 (d,  $J = 9.2$  Hz, 2H), 7.44 (d,  $J = 8.4$  Hz, 4H), 7.66 (d,  $J = 7.6$  Hz, 2H), 7.72 (d,  $J = 8.0$  Hz, 2H), 7.75–7.79 (m, 4H), 7.86 (d,  $J = 9.2$  Hz), 8.01 (d,  $J = 8.0$  Hz, 2H), 8.44 (d,  $J = 8.8$  Hz, 2H).  $^{13}\text{C}$  NMR (100 MHz,  $\text{CDCl}_3$ ):  $\delta = 50.83, 61.97, 67.69, 67.76, 67.80, 69.85, 69.95, 70.30, 70.58, 70.94, 71.03, 71.08, 71.31, 72.64, 87.27, 88.86, 95.26, 95.45, 102.90, 102.93, 110.39, 110.73, 110.79, 114.79, 115.81, 117.61, 118.53, 123.50, 123.69, 124.78, 125.10, 125.11, 125.63, 125.69, 127.04, 128.08, 129.22, 129.78, 130.42, 130.87, 131.12, 131.92, 132.24, 159.03, 159.84, 159.91, 160.03$ . MS (MALDI-TOF):  $m/z$ : 1417.14 (calcd.  $[\text{M}]^+ = 1417.55$ ).

**Compound 3.** Copper iodide (4.03 mg,  $2.11 \times 10^{-2}$  mmol) was added to a mixture of **11** (15.0 mg,  $1.06 \times 10^{-2}$  mmol), *N*-propargylacrylamide (34.6 mg, 0.317 mmol), and  $\text{Et}_3\text{N}$  (1.0 mL) in  $\text{CHCl}_3$  (20 mL). The mixture was then stirred under nitrogen atmosphere for 2 d at r.t. The reaction mixture was poured into  $\text{CHCl}_3$  (200 mL), and the organic layer was washed with 5% aq.  $\text{HCl}$  (30 mL), saturated aq.  $\text{NaHCO}_3$  (50 mL), and saturated aq.  $\text{NaCl}$  (50 mL). The organic layer was dried over  $\text{MgSO}_4$  and filtered before the solvent was evaporated under reduced pressure. The crude product was purified by flash column chromatography on silica gel (eluent: gradient from  $\text{CH}_2\text{Cl}_2/\text{acetone} = 1/1$  v/v to acetone) and recrystallized from chloroform and hexane to afford **3** (5.0 mg,  $3.3 \times 10^{-3}$  mmol, 31%) as a yellow solid.

$^1\text{H}$  NMR (400 MHz,  $\text{DMSO}-d_6$ ):  $\delta = 3.45$ – $3.47$  (m, 2H), 3.50– $3.54$  (m, 2H), 3.58– $3.60$  (m, 6H), 3.63– $3.67$  (m, 10H), 3.77– $3.86$  (m, 14H), 4.10– $4.12$  (m, 4H), 4.16– $4.27$  (br, 8H), 4.40 (d,  $J = 6.0$  Hz, 2H), 4.53 (t,  $J = 5.2$  Hz, 2H), 4.64 (t,  $J = 5.4$  Hz, 1H), 5.60 (dd,  $J = 10.0, 2.4$  Hz, 1H), 6.12 (dd,  $J = 17.2, 2.4$  Hz, 1H), 6.26 (dd,  $J = 17.2, 10.0$  Hz, 1H), 6.71– $6.72$  (m, 2H), 6.93– $6.97$  (m, 8H), 7.43 (d,  $J = 8.4$  Hz, 4H), 7.64 (d,  $J = 8.4$  Hz, 4H), 7.84 (d,  $J = 9.2$  Hz, 2H), 7.96– $8.02$  (m, 5H), 8.07 (d,  $J = 8.0$  Hz, 2H), 8.14 (d,  $J = 7.6$  Hz, 2H), 8.53 (d,  $J = 9.2$  Hz, 2H), 8.65 (t,  $J = 5.2$  Hz, 1H).  $^{13}\text{C}$  NMR (100 MHz,  $\text{DMSO}-d_6, 45$  °C):  $\delta = 34.05, 49.20, 60.15, 67.39, 67.47, 67.53, 68.68, 68.72, 68.82, 69.52,$

69.69, 69.89, 70.08, 72.26, 86.41, 87.92, 95.22, 95.26, 102.61, 109.66, 110.62, 114.27, 114.71, 116.91, 117.55, 122.62, 122.82, 123.07, 123.85, 124.85, 124.93, 125.05, 125.12, 127.20, 128.08, 128.88, 129.55, 129.83, 130.20, 130.25, 131.01, 131.47, 132.74, 158.78, 159.70, 164.35. HRMS (ESI-TOF): m/z: 786.2928 (calcd.  $[M+2Na]^{2+} = 786.2911$ ).

## Preparation of DMSO gels and hydrogels

**DG1** and **HG1**. A solution of acrylamide (455 mg, 6.40 mmol), ethyl acrylate (961 mg, 9.60 mmol), *N,N'*-methylenebisacrylamide (1.67 mg,  $1.08 \times 10^{-2}$  mmol), **1** (2.0 mg,  $1.2 \times 10^{-3}$  mmol), and *N,N,N',N'*-tetramethylethylenediamine (6.4  $\mu$ L) in DMSO (3.5 mL) was degassed using freeze-pump-thaw cycles and purged with  $N_2$ . A solution of ammonium persulfate (APS, 40.5 mg, 0.177 mmol) in DMSO (3.0 mL) was also degassed using freeze-pump-thaw cycles and purged with  $N_2$ . After adding 0.5 mL of the APS solution to the reaction mixture in a glovebox, free radical polymerization proceeded at ambient temperature for 3 d in the template (cuboid, ca. 68 mm  $\times$  ca. 18 mm  $\times$  1 mm). After the polymerization, the resultant DMSO gel **DG1** was immersed into deionized water ( $5 \times 30$  mL, over 1 h), resulting in hydrogel **HG1** (swelling ratio: 0.67). The complete replacement with water was confirmed by the NMR spectrum of the solvent after 5th replacement. No peaks corresponding to DMSO were observed.

**DG2** and **HG2**. A solution of acrylamide (455 mg, 6.40 mmol), ethyl acrylate (961 mg, 9.60 mmol), *N,N'*-methylenebisacrylamide (1.48 mg,  $9.60 \times 10^{-3}$  mmol), **2** (2.4 mg,  $2.4 \times 10^{-3}$  mmol), and *N,N,N',N'*-tetramethylethylenediamine (6.4  $\mu$ L) in DMSO (3.5 mL) was degassed using freeze-pump-thaw cycles and purged with  $N_2$ . A solution of APS (40.5 mg, 0.177 mmol) in DMSO (3.0 mL) was also degassed using freeze-pump-thaw cycles and purged with  $N_2$ . After adding 0.5 mL of the APS solution to the reaction mixture in glovebox, free radical polymerization proceeded at ambient temperature for 3 d in the template (cuboid, ca. 68 mm  $\times$  ca. 18 mm  $\times$  1 mm). After the polymerization, the resultant DMSO gel **DG2** was immersed into deionized water ( $5 \times 30$  mL, over 1 h), resulting in hydrogel **HG2** (swelling ratio: 0.68).

**DG3** and **HG3**. A solution of acrylamide (455 mg, 6.40 mmol), ethyl acrylate (961 mg, 9.60 mmol), *N,N'*-methylenebisacrylamide (1.85 mg,  $1.20 \times 10^{-2}$  mmol), **3** (2.0 mg,  $1.3 \times 10^{-3}$  mmol), and *N,N,N',N'*-tetramethylethylenediamine (6.4  $\mu$ L) in DMSO (3.5 mL) was degassed using freeze-pump-thaw cycles and purged with  $N_2$ . A solution of APS (40.5 mg, 0.177 mmol) in DMSO (3.0 mL) was also degassed using freeze-pump-thaw cycles and purged with  $N_2$ . After adding 0.5 mL of the APS solution to the reaction mixture in glovebox, free radical polymerization proceeded at ambient temperature for 3 d in the template (cuboid, ca. 68 mm  $\times$  ca. 18 mm  $\times$  1 mm). After the polymerization, the resultant DMSO gel **DG3** immersed into deionized water ( $5 \times 30$  mL, over 1 h), resulting in hydrogel **HG3** (swelling ratio: 0.64).

**DG4** and **HG4**. A solution of acrylamide (455 mg, 6.40 mmol), ethyl acrylate (961 mg, 9.60 mmol), *N,N'*-methylenebisacrylamide (1.85 mg,  $1.20 \times 10^{-2}$  mmol), and *N,N,N',N'*-tetramethylethylenediamine (6.4  $\mu$ L) in DMSO (3.5 mL) was degassed using freeze-pump-thaw cycles and purged with  $N_2$ . A solution of APS (40.5 mg, 0.177 mmol)



in DMSO (3.0 mL) was also degassed using freeze-pump-thaw cycles and purged with  $N_2$ . After adding 0.5 mL of the APS solution to the reaction mixture in glovebox, free radical polymerization proceeded at ambient temperature for 3 d in the template (cuboid, ca. 68 mm  $\times$  ca. 18 mm  $\times$  1 mm). After the polymerization, the resultant DMSO gel **DG4** immersed into deionized water ( $5 \times 30$  mL, over 1 h), resulting in hydrogel **HG4** (swelling ratio: 0.75).

**Polyacrylamide gels.** A solution of acrylamide (1.13 g, 16.0 mmol),  $N,N'$ -methylenebisacrylamide (24.7 mg, 0.160 mmol), and  $N,N,N',N'$ -tetramethylethylenediamine (6.4  $\mu$ L) in DMSO (3.5 mL) was degassed using freeze-pump-thaw cycles and purged with  $N_2$ . A solution of APS (24.7 mg, 0.16 mmol) in DMSO (3.0 mL) was also degassed using freeze-pump-thaw cycles and purged with  $N_2$ . After adding 0.5 mL of the APS solution to the reaction mixture in a glovebox, free radical polymerization proceeded at ambient temperature for 3 d in the template (cuboid, ca. 68 mm  $\times$  ca. 18 mm  $\times$  1 mm). After the polymerization, the resultant DMSO gel of polyacrylamide was immersed into deionized water ( $5 \times 30$  mL, over 1 h), resulting in polyacrylamide hydrogel.

### Emission spectra in solution

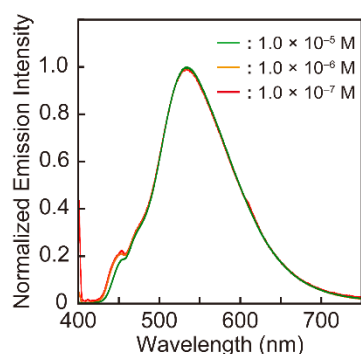

**Fig. S1.** Photoluminescence spectra of compound **1** varying the concentrations in DMSO. The excitation wavelength was 400 nm.

## Emission lifetime measurements in solution

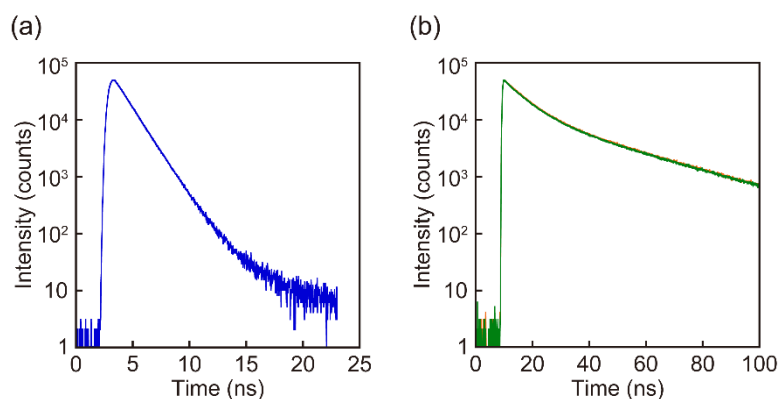

**Fig. S2.** (a) Emission decay profile of compound **2** (monitored at 430 nm) in DMSO ( $c = 1.0 \times 10^{-6}$  M). (b) Emission decay profiles of mechanophore **1** (green) and compound **3** (orange) (monitored at 530 nm) in DMSO ( $c = 1.0 \times 10^{-6}$  M). The excitation wavelength was 405 nm.

## Fluorescence quantum yields of compounds and gels

**Table S1.** Quantum yields of compounds in DMSO and hydrogels. The excitation wavelength was 380 nm.

|    | <b>1</b> | <b>2</b> | <b>3</b> | <b>HG1</b> | <b>HG2</b> | <b>HG3</b> | <b>HG4</b> swollen with an aqueous solution of ANS | Polyacrylamide gel swollen with an aqueous solution of ANS |
|----|----------|----------|----------|------------|------------|------------|----------------------------------------------------|------------------------------------------------------------|
| QY | 0.65     | 0.85     | 0.77     | 0.63       | 0.77       | 0.55       | 0.38                                               | 0.02                                                       |

## Small-angle neutron scattering (SANS) measurement

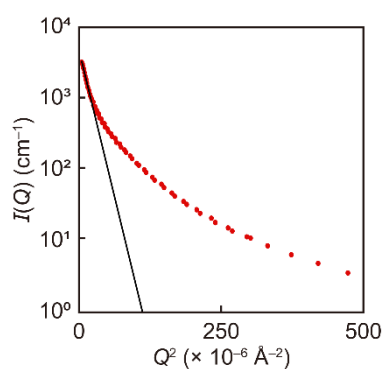

**Fig. S3.** SANS profile of **HG1** (red dot) and a fitting line (black line) according to Guinier plot in the range from  $2.22$  to  $3.99 \times 10^{-3}$  ( $\text{\AA}^{-1}$ ).  $\ln I(Q) = -75996Q^2 + 8.49$  was given as the equation of the fitting line.

## Mechanical properties of hydrogels

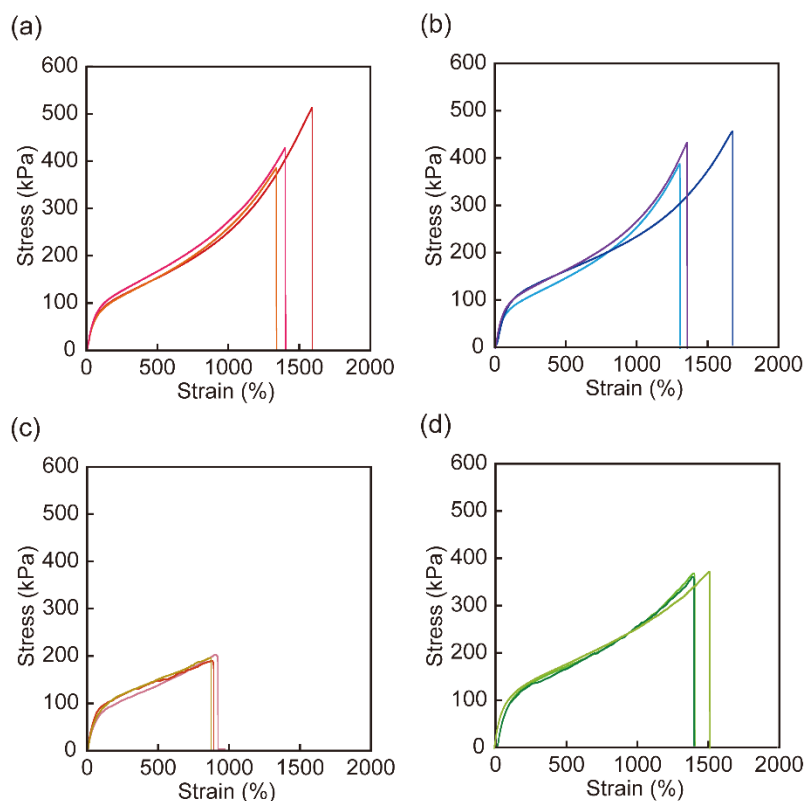

**Fig. S4.** Stress-strain curves of (a) HG1, (b) HG2, (c) HG3, and (d) HG4. Each graph shows data obtained from three different specimen. The experiments were conducted with a strain rate of  $0.2 \text{ s}^{-1}$ .

**Table S2.** Mechanical properties of hydrogels derived from tensile tests.<sup>a)</sup>

|            | Elongation at break (%) | Stress at break (kPa) | Young's modulus <sup>b)</sup> (kPa) |
|------------|-------------------------|-----------------------|-------------------------------------|
| <b>HG1</b> | $1444 \pm 148$          | $442 \pm 71$          | $1.59 \pm 0.11$                     |
| <b>HG2</b> | $1445 \pm 231$          | $427 \pm 37$          | $1.46 \pm 0.83$                     |
| <b>HG3</b> | $892 \pm 24$            | $195 \pm 6$           | $1.81 \pm 0.33$                     |
| <b>HG4</b> | $1431 \pm 91$           | $370 \pm 9$           | $2.02 \pm 0.20$                     |

a) All data were extracted from the strain-stress curves shown in Fig. S4 and represent averages of 3 measurements  $\pm$  standard derivation. b) The Young's moduli were derived from the slopes of the strain-stress curves in the strain regime between 4–6%.

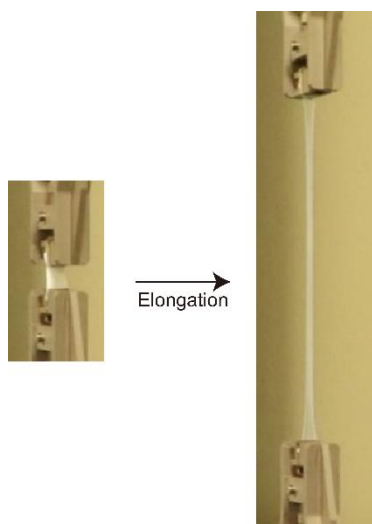

**Fig. S5.** Photographs of **HG4** during the tensile test at 0% (left) and 1400% (right).

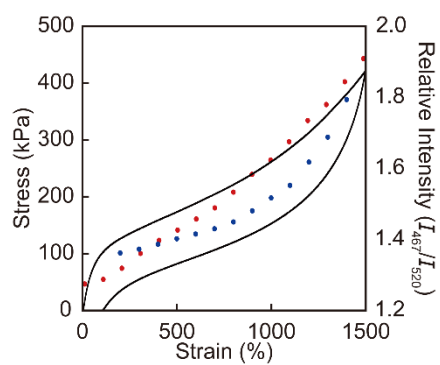

**Fig. S6.** Stress-strain curve of **HG1** (black line) and the relative monomer to excimer emission intensity (stretching; red dot, relaxing; blue dot).

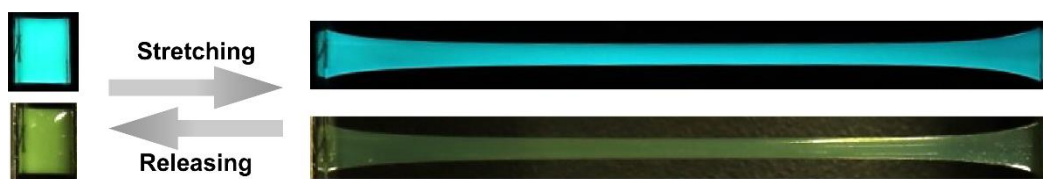

**Fig. S7.** Pictures of **HG1** under excitation light of 365 nm (top) and under room light (bottom) at 0% (left) and 1500% (right).

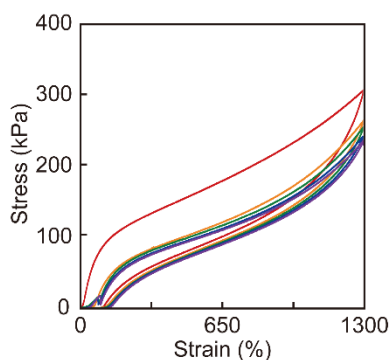

**Fig. S8.** Stress-strain curves during the cycle test (1st; red line, 2nd; orange line, 3rd; green line, 4th; blue line, 5th; purple line).

### Photophysical properties of gels and dry films

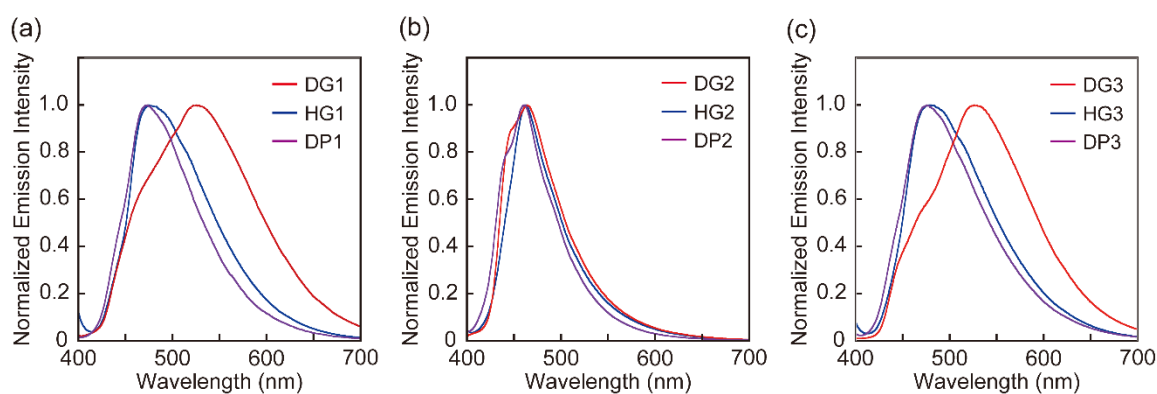

**Fig. S9.** Fluorescence spectra of DMSO gels (red line), hydrogels (blue line), and dry polymers (purple line) having compound (a) **1**, (b) **2**, or (c) **3**. The excitation wavelength was 385 nm.

### Photophysical properties of HG2 and HG3 upon deformation

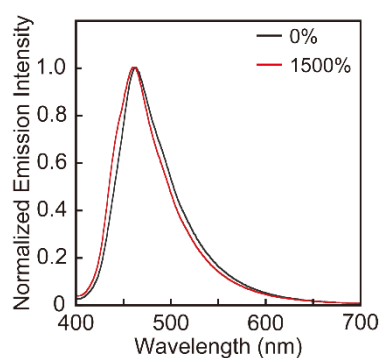

**Fig. S10.** Emission spectra of **HG2** before stretching (black line) and at strain of 1500% (green line). The excitation wavelength was 385 nm.

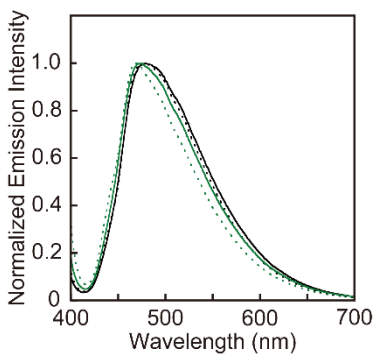

**Fig. S11.** Emission spectra of **HG3** before stretching (black line) and at strain of 900% (green line). Emission spectra of **HG1** before stretching (black dotted line) and at strain of 900% (green dotted line) are superimposed for reference purpose. The excitation wavelength was 385 nm.

### Emission decay profiles of **HG1** upon stretching

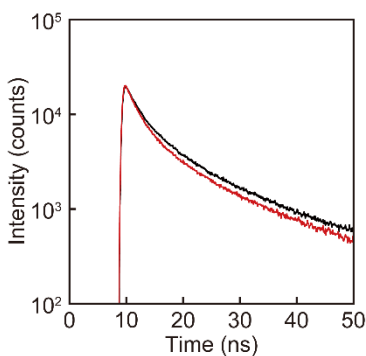

**Fig. S12.** Emission decay profiles of **HG1** recorded in the force-free state (black) and at strain of 1000% (red). The decays were monitored at 530 nm with excitation light of 405 nm.

### Changes of the fluorescence intensity ratio during stress relaxation

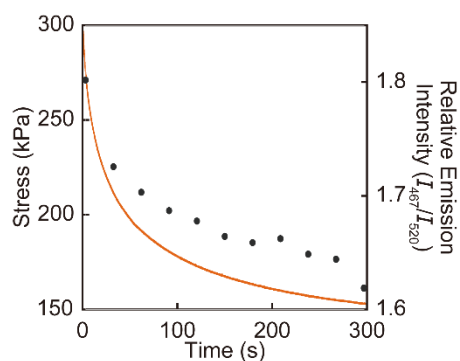

**Fig. S13.** Time-dependent stress curve (orange line) and the relative monomer to excimer intensity (dot) of **HG1** kept at strain of 1300%.

## References

- S1. Y. Sagara, H. Traeger, J. Li, Y. Okado, S. Schrettl, N. Tamaoki and C. Weder, Mechanically Responsive Luminescent Polymers Based on Supramolecular Cyclophane Mechanophores, *J. Am. Chem. Soc.*, 2021, **143**, 5519–5525.
- S2. Z. Chen, T. Sun and G. Qing, cAMP-modulated biomimetic ionic nanochannels based on a smart polymer, *J. Mater. Chem. B*, 2019, **7**, 3710–3715.

# NMR spectra

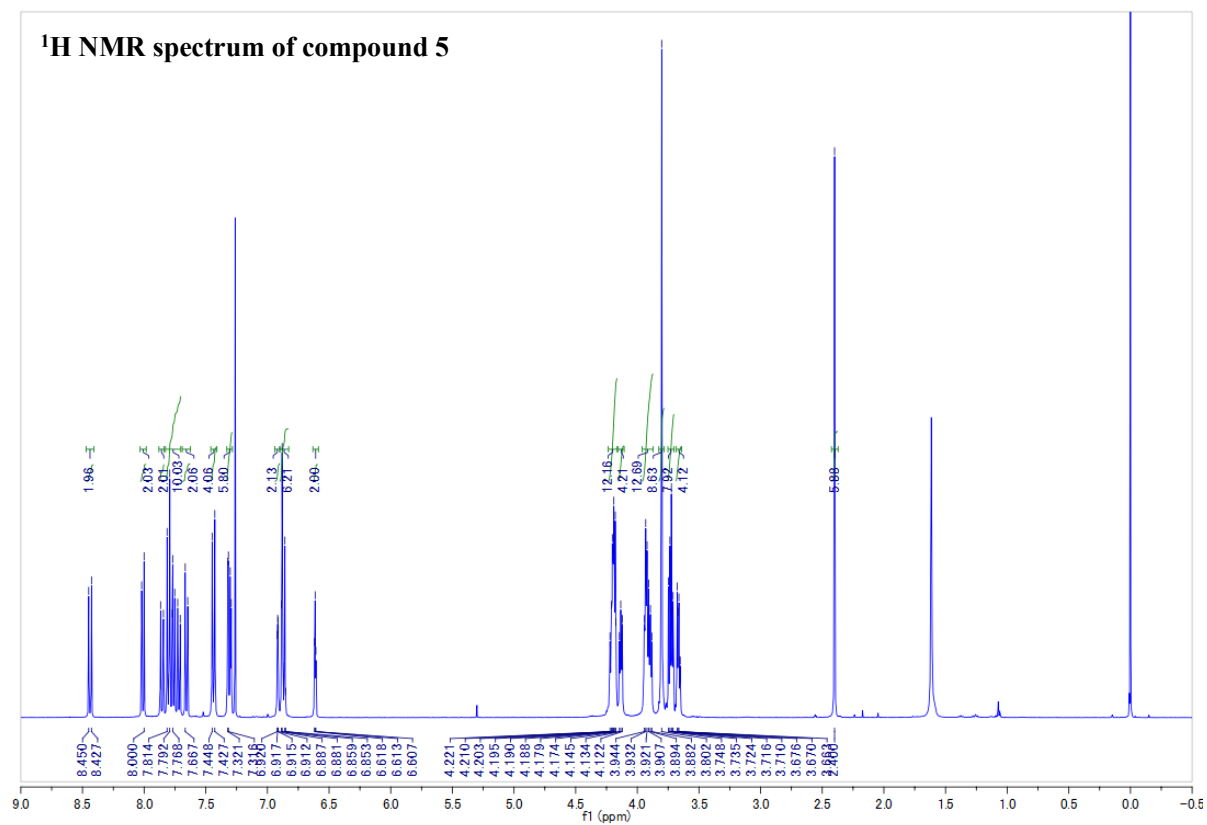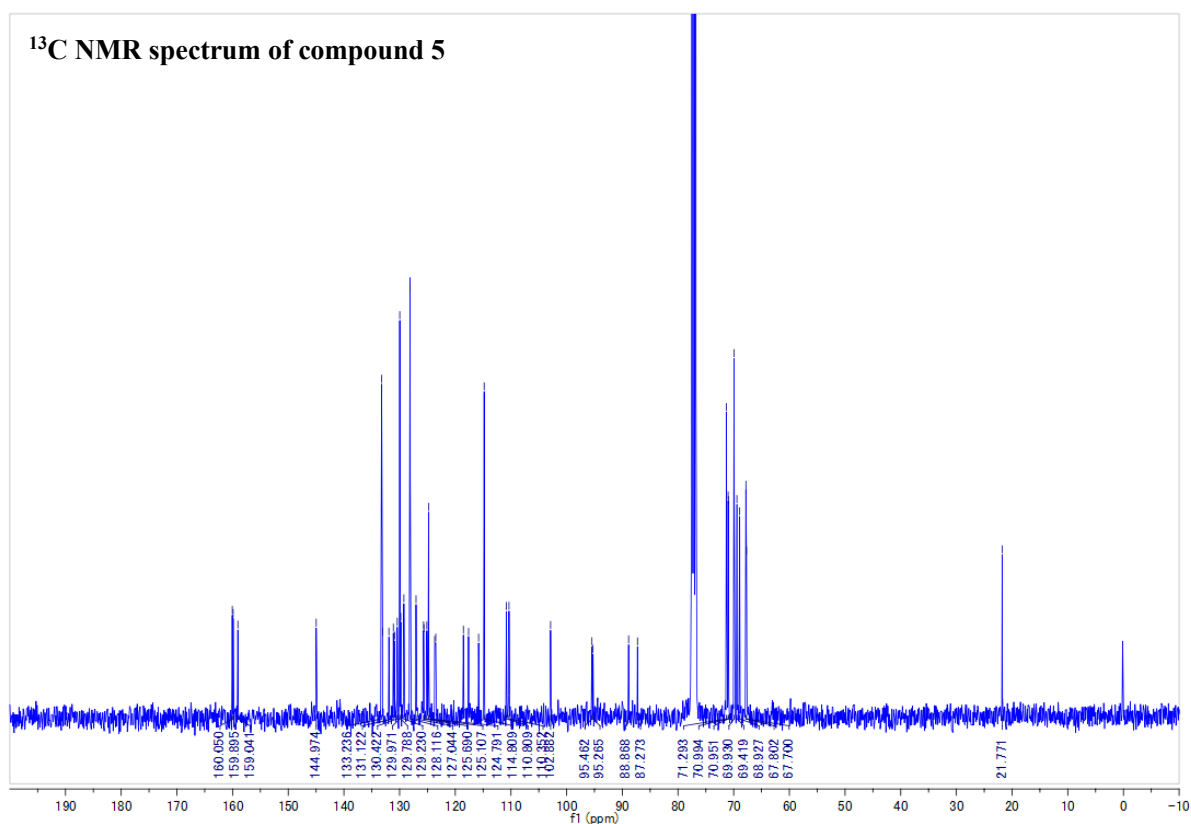



**<sup>1</sup>H NMR spectrum of compound 6**

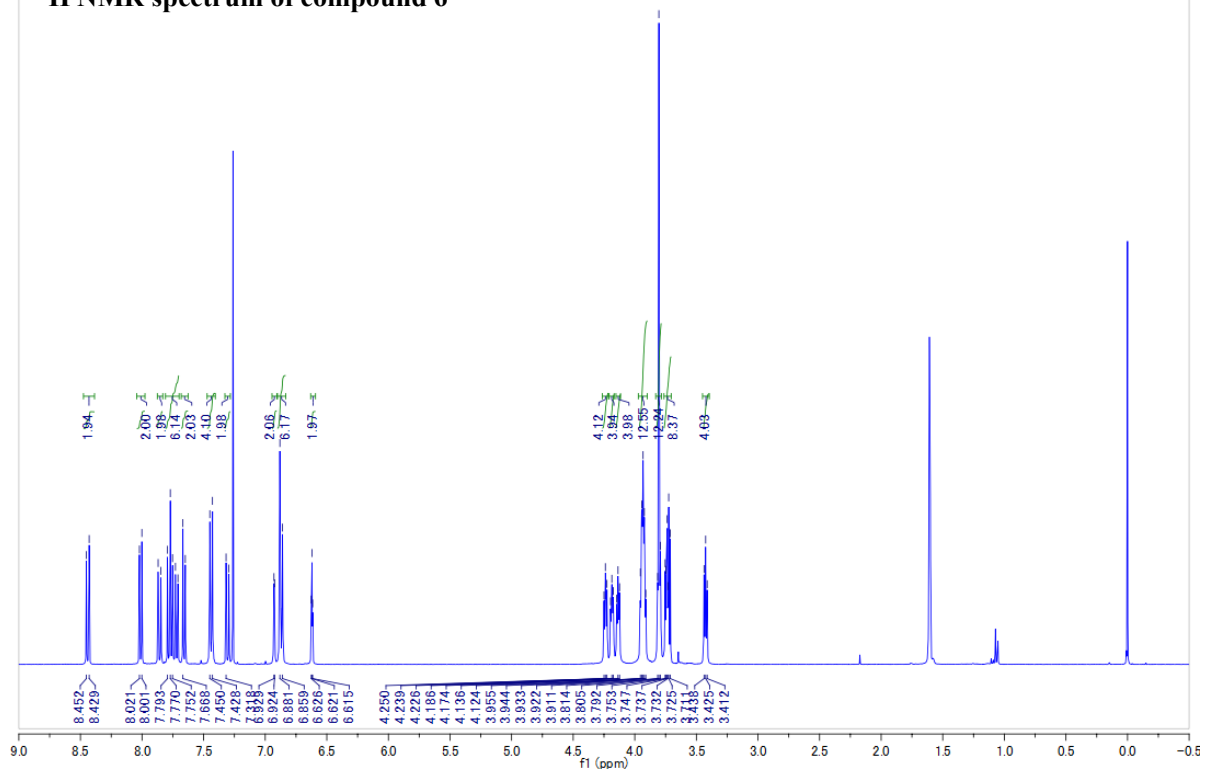

**<sup>13</sup>C NMR spectrum of compound 6**

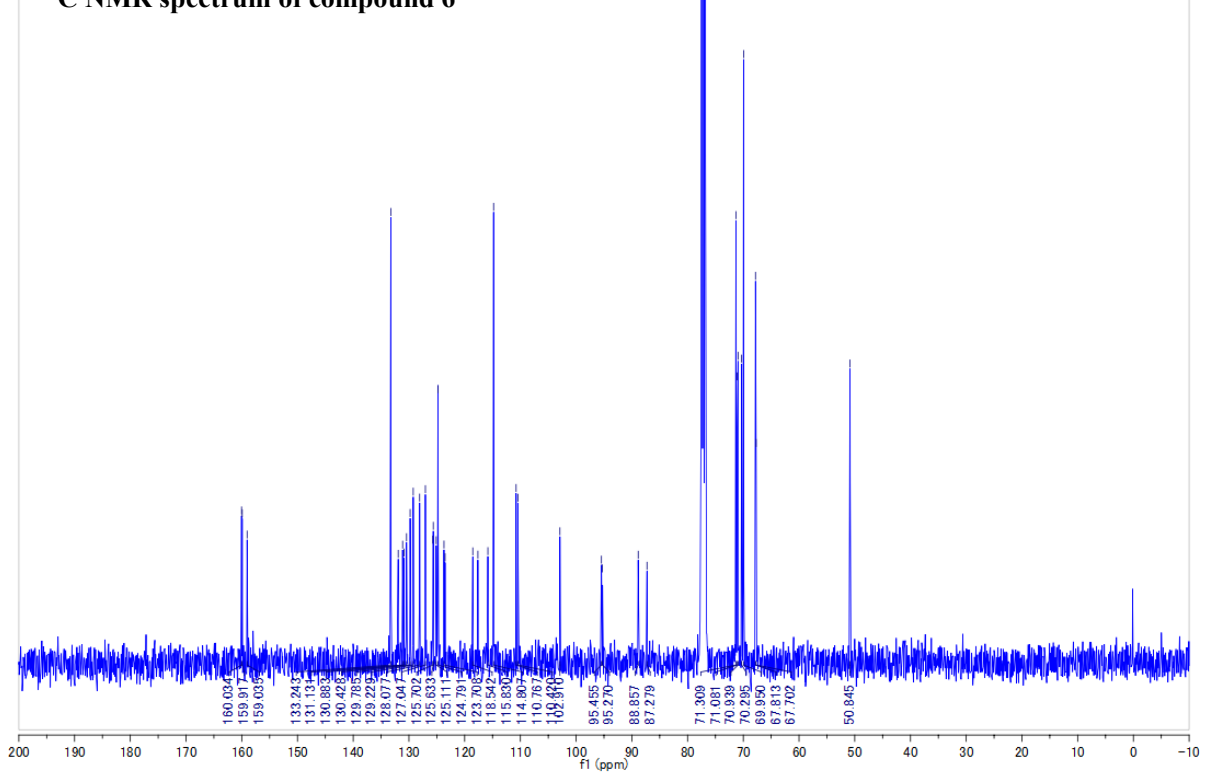

**<sup>1</sup>H NMR spectrum of compound 1**

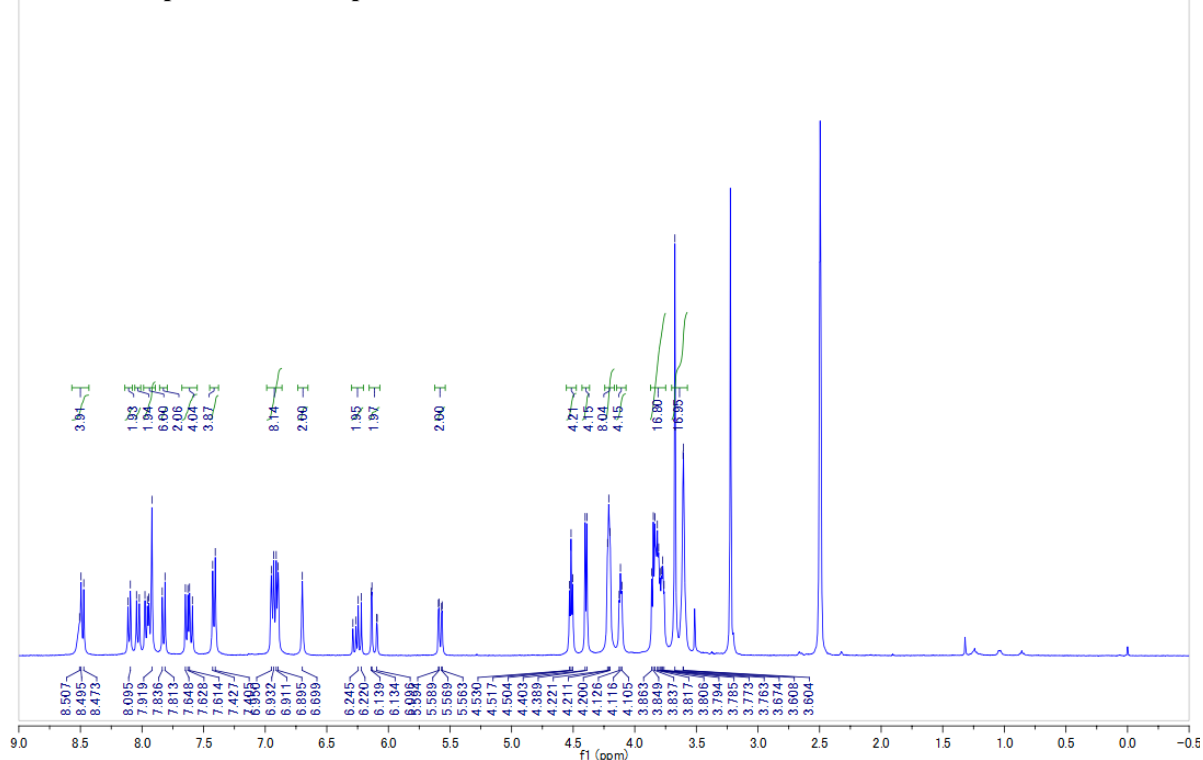

**<sup>13</sup>C NMR spectrum of compound 1**

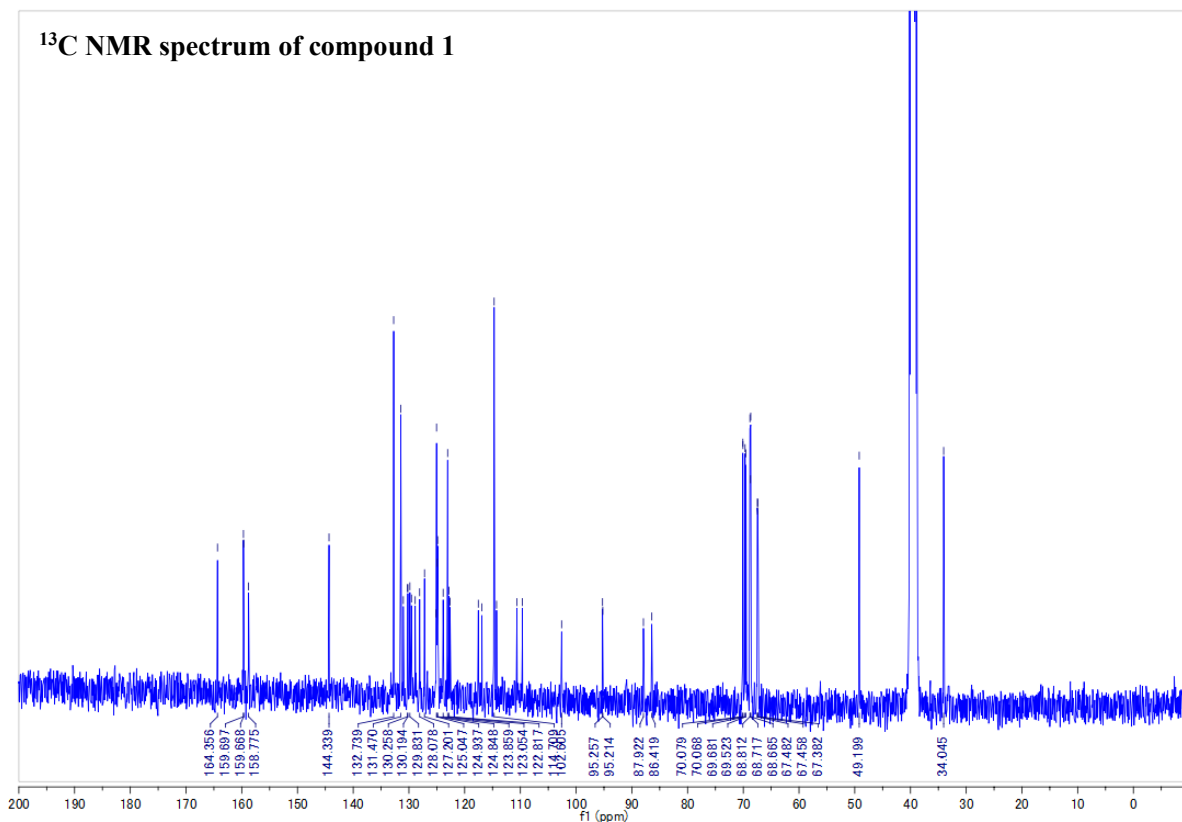

**<sup>1</sup>H NMR spectrum of compound 8**

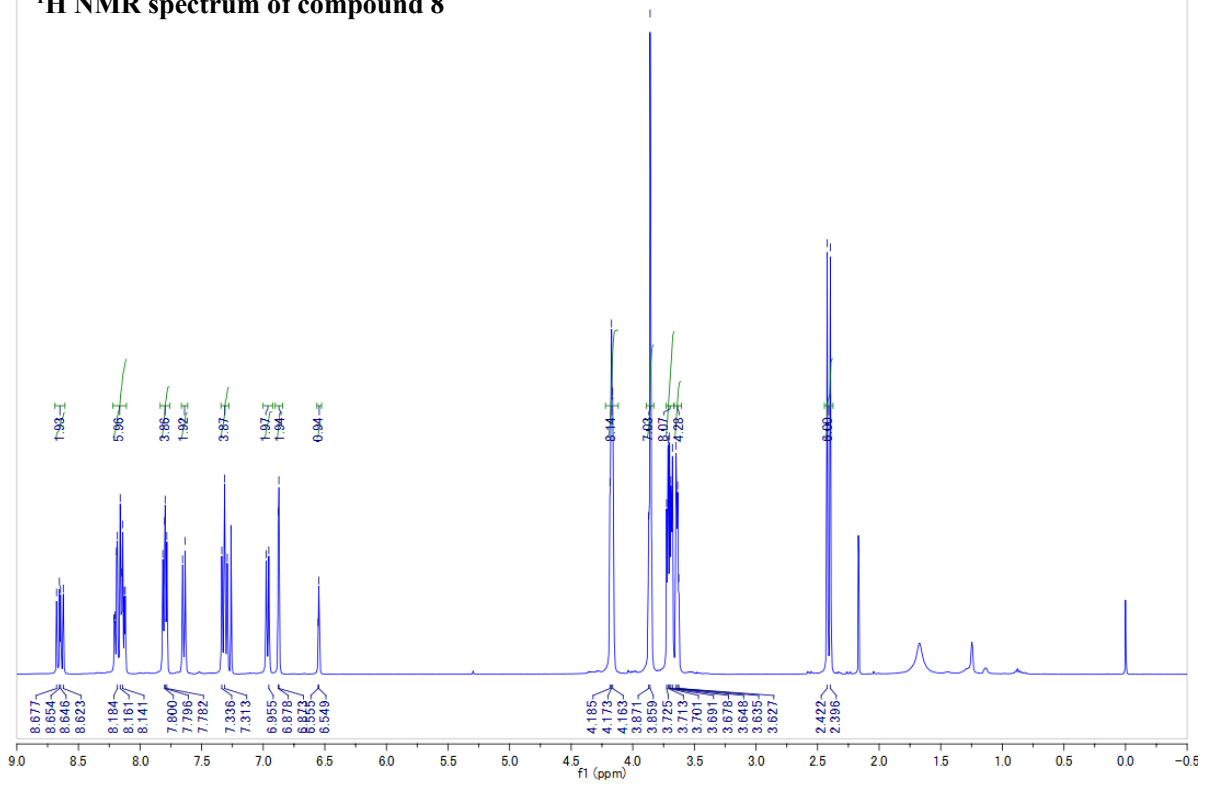

**<sup>13</sup>C NMR spectrum of compound 8**

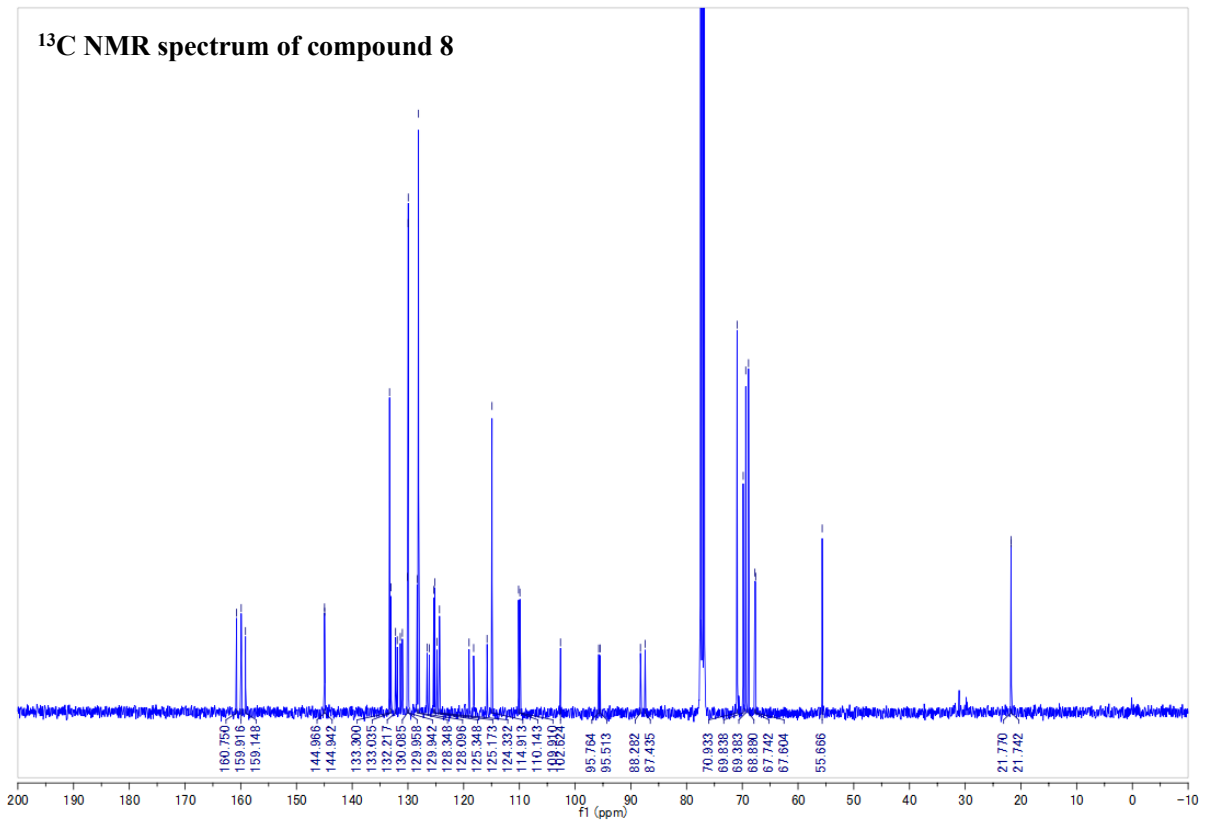

**<sup>1</sup>H NMR spectrum of compound 9**

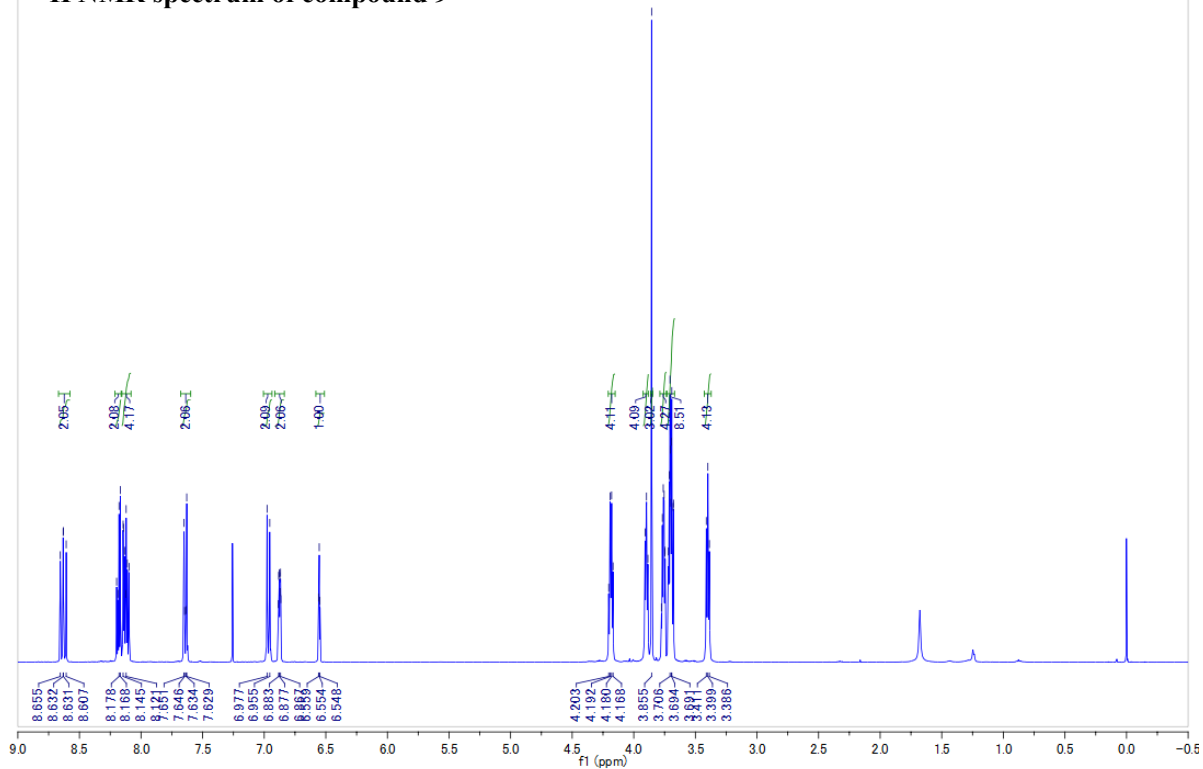

**<sup>13</sup>C NMR spectrum of compound 9**

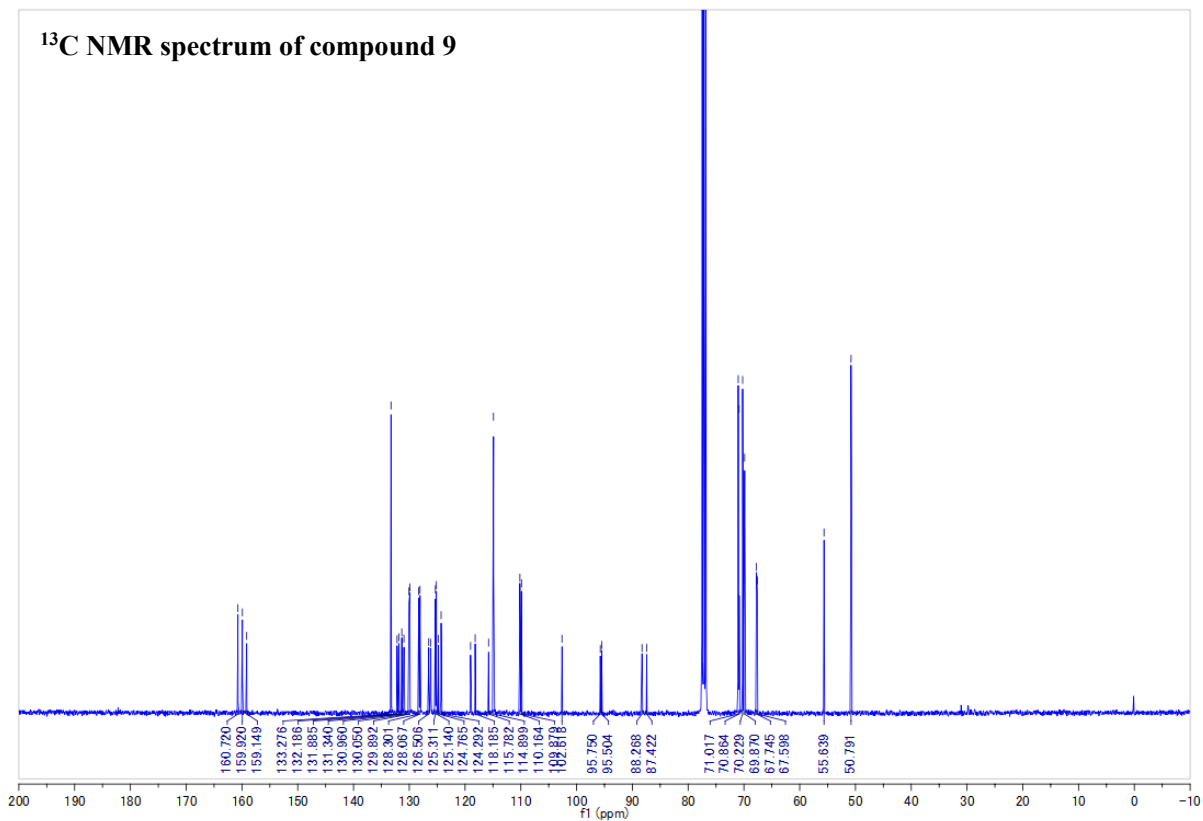

**<sup>1</sup>H NMR spectrum of compound 2**

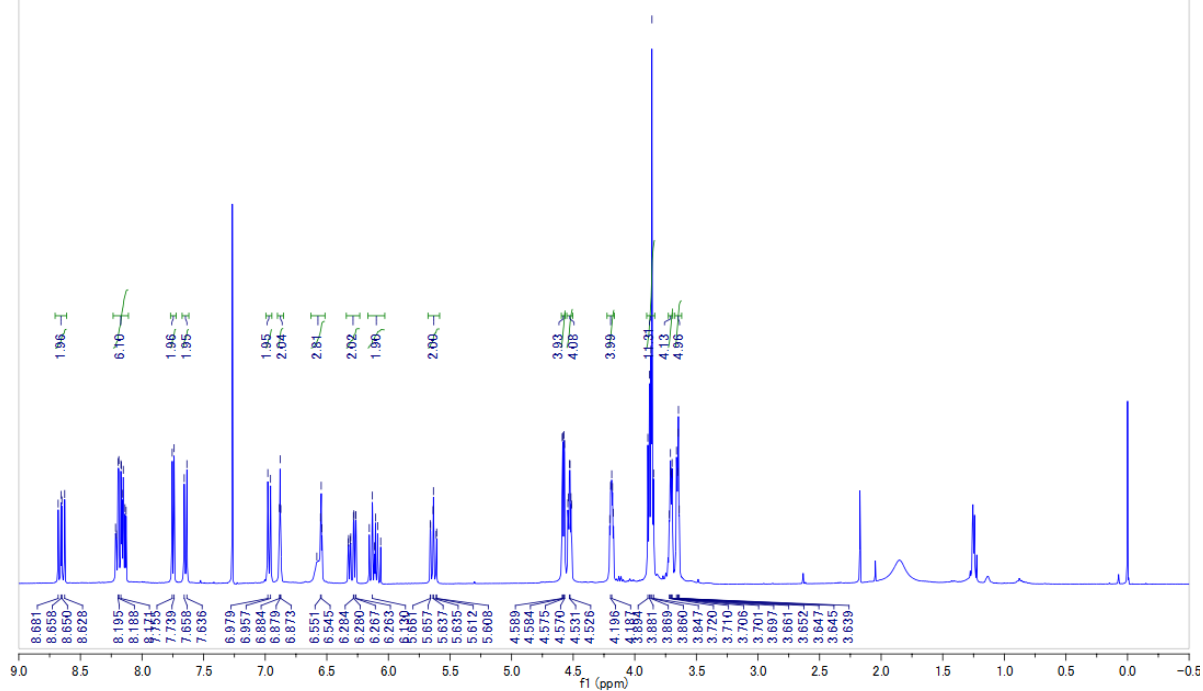

**<sup>13</sup>C NMR spectrum of compound 2**

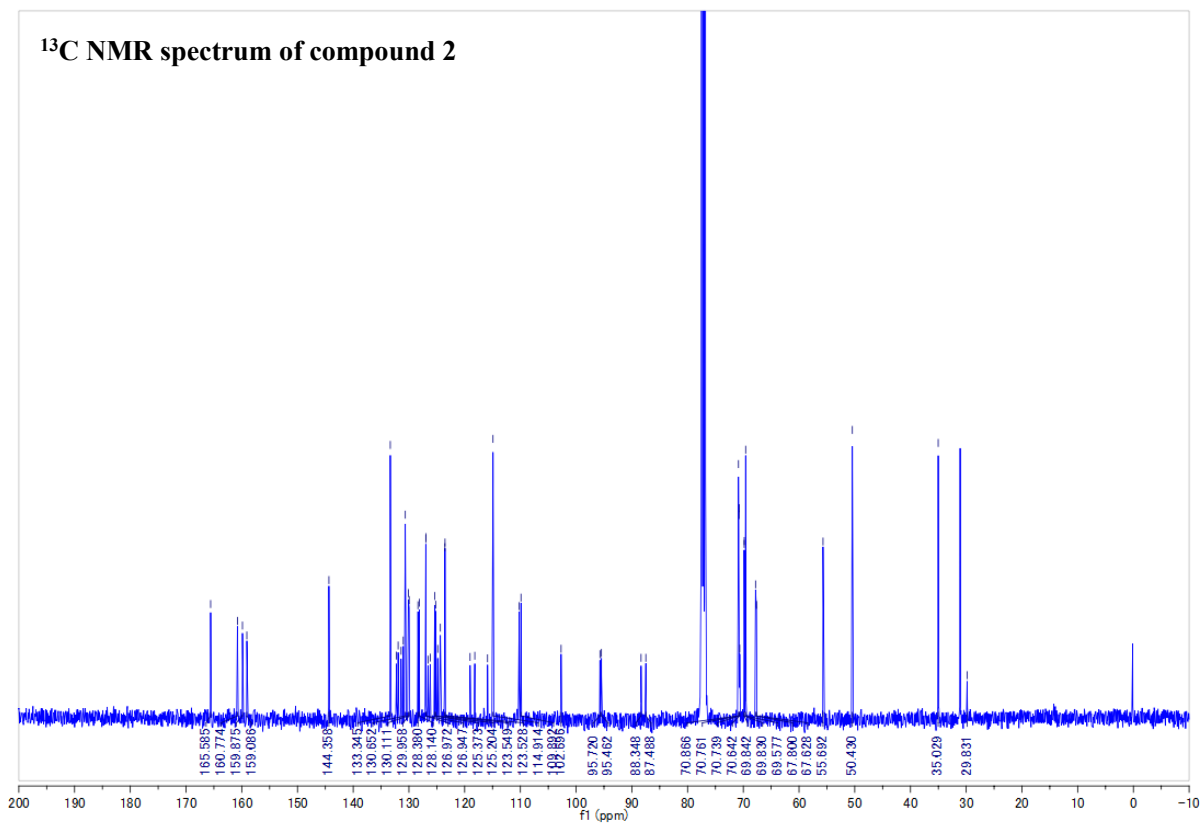

**<sup>1</sup>H NMR spectrum of compound 10**

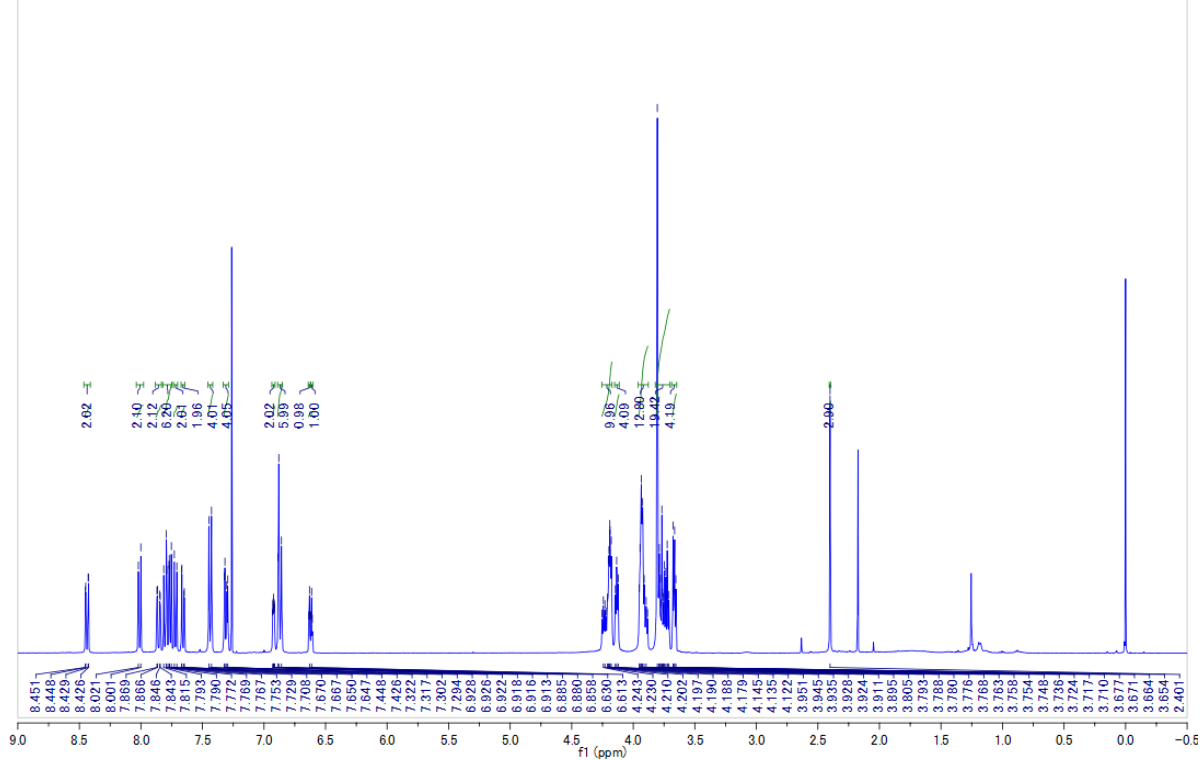

**<sup>13</sup>C NMR spectrum of compound 10**

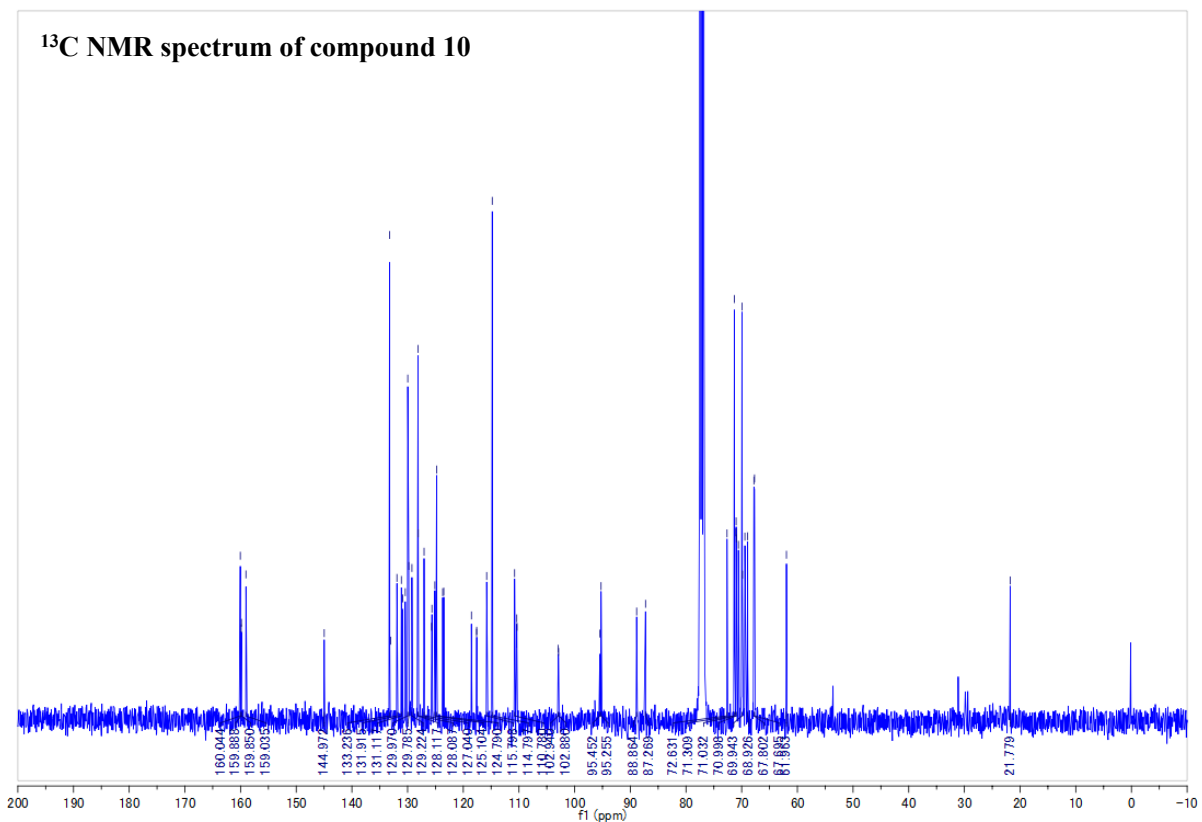

**<sup>1</sup>H NMR spectrum of compound 11**

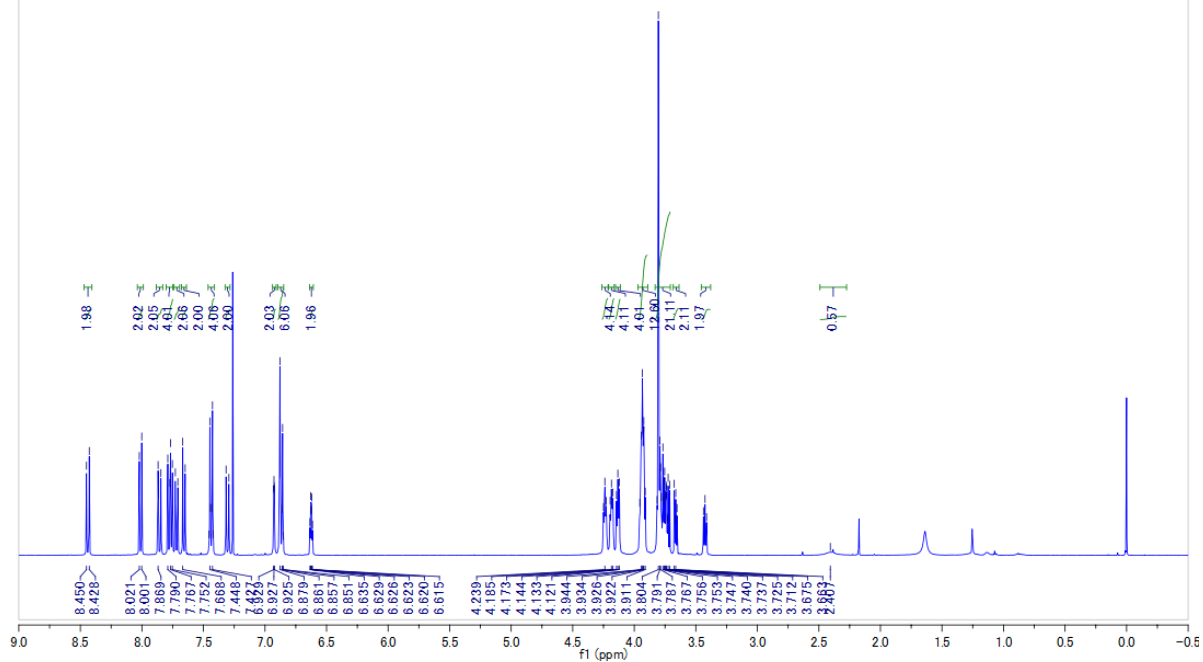

**<sup>13</sup>C NMR spectrum of compound 11**

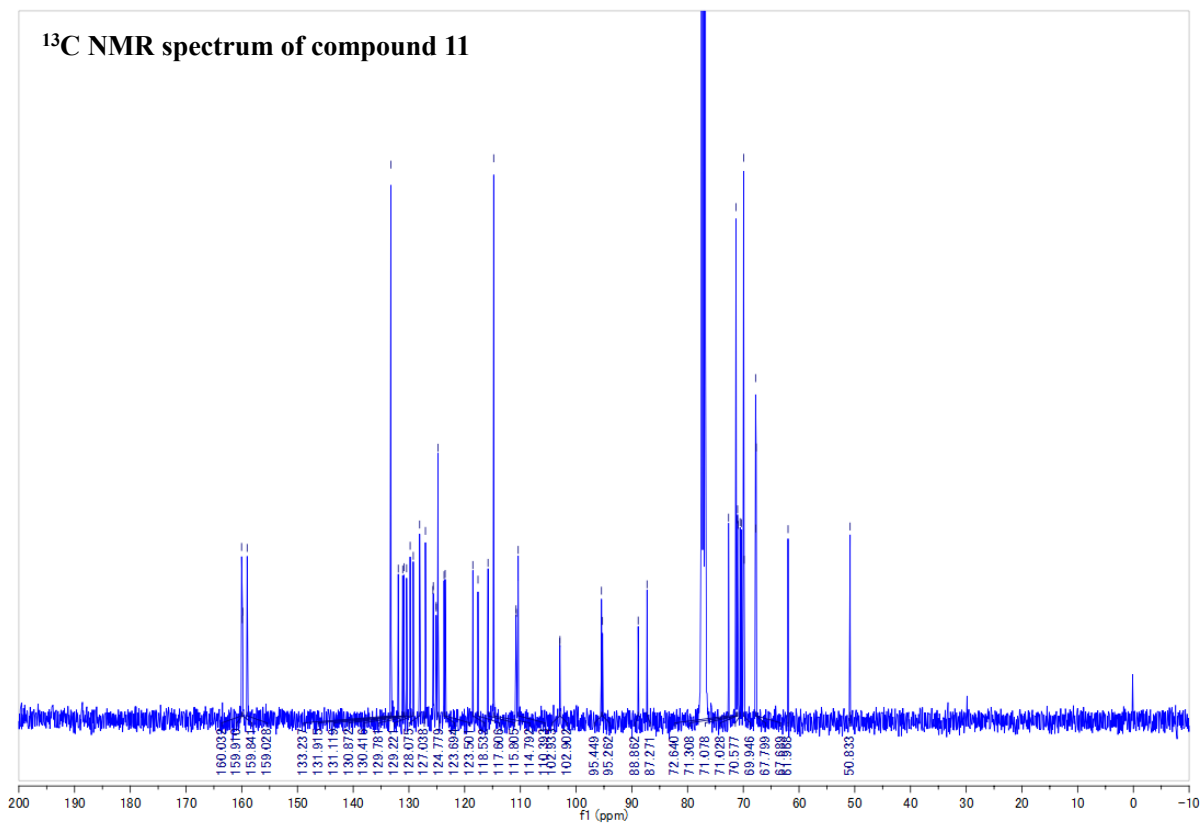

**<sup>1</sup>H NMR spectrum of compound 3**

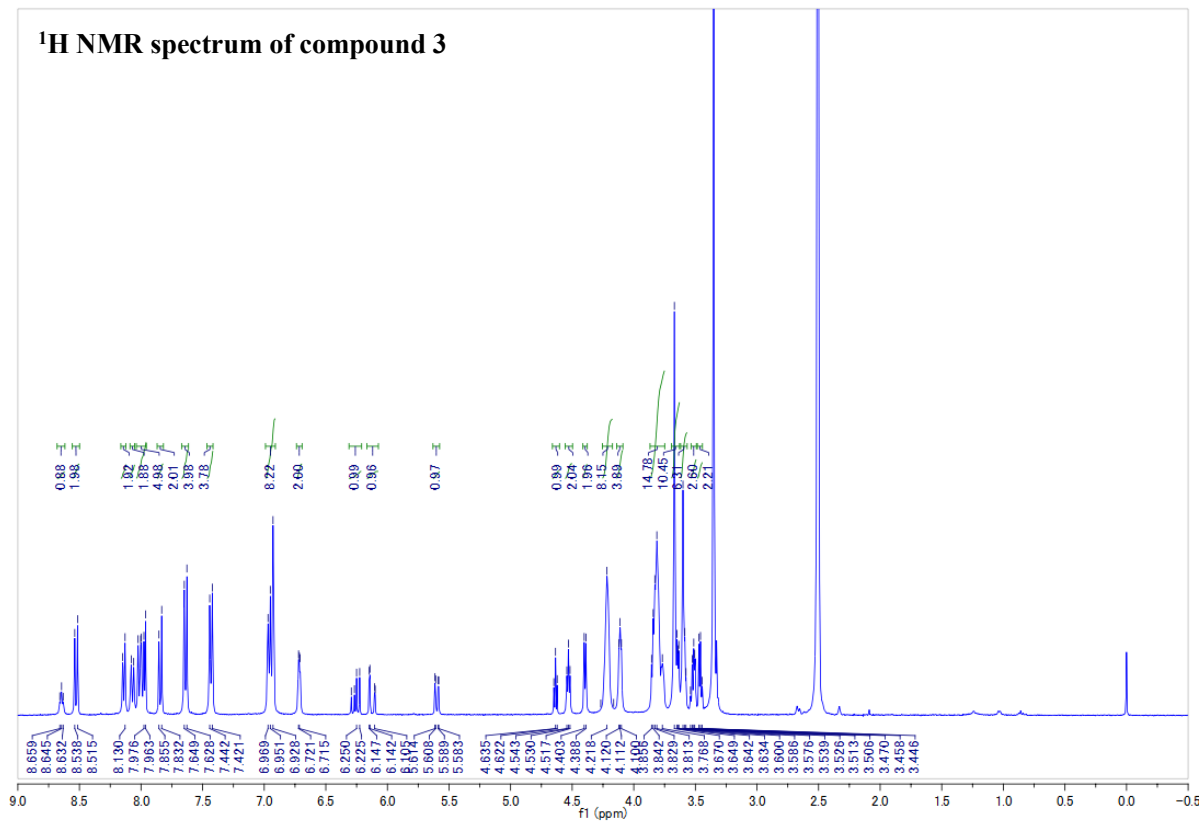

**<sup>13</sup>C NMR spectrum of compound 3**

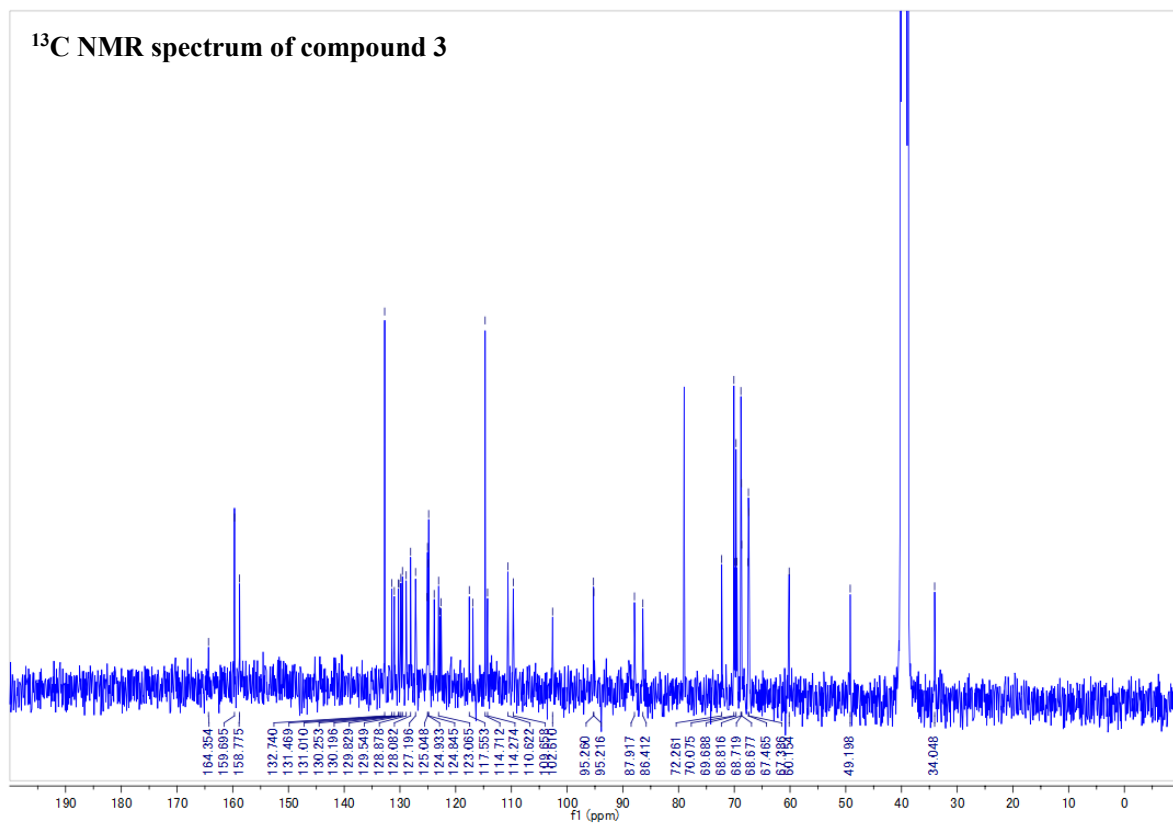

Supplement: d3qm00579h1.pdf [file d3qm00579h1.pdf]
